# Supplementary material for: Bioactive thionic compounds and aromatic glycosides from Ligusticum chuanxiong
Source: PubMed Central journal article supplement — Acta Pharm Sin B. 2018 Apr 11;8(5):818–24. doi: 10.1016/j.apsb.2018.04.002 (PMC6147803; doi:10.1016/j.apsb.2018.04.002), 2018-04-11
Supplement: mmc1.pdf [file mmc1.pdf]

## Supplementary information

### ORIGINAL ARTICLE

#### Bioactive thionic compounds and aromatic glycosides from *Ligusticum chuanxiong*

Xu Zhang<sup>†</sup>, Bing Han<sup>†</sup>, Ziming Feng, Jianshuang Jiang, Yanan Yang, Peicheng Zhang\*

*State Key Laboratory of Bioactive Substance and Function of Natural Medicines,  
Institute of Materia Medica, Peking Union Medical College and Chinese Academy of  
Medical Sciences, Beijing 100050, China*

\*Corresponding author. Tel.: +86 10 63165231. Fax: +86 10 63017757.

E-mail address: pczhang@imm.ac.cn (Peicheng Zhang).

†These authors made equal contributions to this work.

#### Table of Contents

| No. | Contents                                                                      | Compound | Page |
|-----|-------------------------------------------------------------------------------|----------|------|
| 1   | The <sup>1</sup> H NMR spectrum in DMSO- <i>d</i> <sub>6</sub> (500 MHz)      | 1        | S3   |
| 2   | The <sup>13</sup> C NMR spectrum in DMSO- <i>d</i> <sub>6</sub> (125 MHz)     | 1        | S3   |
| 3   | The HSQC spectrum in DMSO- <i>d</i> <sub>6</sub> (500 MHz)                    | 1        | S4   |
| 4   | The HMBC spectrum in DMSO- <i>d</i> <sub>6</sub> (500 MHz)                    | 1        | S4   |
| 5   | The UV spectrum in MeOH                                                       | 1        | S5   |
| 6   | The IR spectrum                                                               | 1        | S5   |
| 7   | The HR-ESI-MS data                                                            | 1        | S6   |
| 8   | The [Mo <sub>2</sub> (AcO) <sub>4</sub> ] induced ECD spectrum in DMSO        | 1        | S7   |
| 9   | The <sup>1</sup> H NMR spectrum in methanol- <i>d</i> <sub>4</sub> (500 MHz)  | 2        | S7   |
| 10  | The <sup>13</sup> C NMR spectrum in methanol- <i>d</i> <sub>4</sub> (125 MHz) | 2        | S8   |

|    |                                                                                       |         |     |
|----|---------------------------------------------------------------------------------------|---------|-----|
| 11 | The HSQC spectrum in methanol- <i>d</i> <sub>4</sub> (500 MHz)                        | 2       | S8  |
| 12 | The HMBC spectrum in methanol- <i>d</i> <sub>4</sub> (500 MHz)                        | 2       | S9  |
| 13 | The UV spectrum in MeOH                                                               | 2       | S9  |
| 14 | The IR spectrum                                                                       | 2       | S10 |
| 15 | The HR-ESI-MS data                                                                    | 2       | S11 |
| 16 | The <sup>1</sup> H NMR spectrum in DMSO- <i>d</i> <sub>6</sub> (600 MHz)              | 3       | S12 |
| 17 | The <sup>13</sup> C NMR spectrum in DMSO- <i>d</i> <sub>6</sub> (150 MHz)             | 3       | S12 |
| 18 | The HSQC spectrum in DMSO- <i>d</i> <sub>6</sub> (600 MHz)                            | 3       | S13 |
| 19 | The HMBC spectrum in DMSO- <i>d</i> <sub>6</sub> (600 MHz)                            | 3       | S13 |
| 20 | The UV spectrum in MeOH                                                               | 3       | S14 |
| 21 | The IR spectrum                                                                       | 3       | S14 |
| 22 | The HR-ESI-MS data                                                                    | 3       | S15 |
| 23 | The [Mo <sub>2</sub> (AcO) <sub>4</sub> ] induced ECD spectrum in DMSO                | 3       | S16 |
| 24 | The ECD spectrum in MeOH                                                              | 3       | S16 |
| 25 | The <sup>1</sup> H NMR spectrum in DMSO- <i>d</i> <sub>6</sub> (500 MHz)              | 4       | S17 |
| 26 | The <sup>13</sup> C NMR spectrum in DMSO- <i>d</i> <sub>6</sub> (125 MHz)             | 4       | S17 |
| 27 | The HSQC spectrum in DMSO- <i>d</i> <sub>6</sub> (500 MHz)                            | 4       | S18 |
| 28 | The HMBC spectrum in DMSO- <i>d</i> <sub>6</sub> (500 MHz)                            | 4       | S18 |
| 29 | The UV spectrum in MeOH                                                               | 4       | S19 |
| 30 | The IR spectrum                                                                       | 4       | S19 |
| 31 | The HR-ESI-MS data                                                                    | 4       | S20 |
| 32 | The <sup>1</sup> H NMR spectrum in DMSO- <i>d</i> <sub>6</sub> (500 MHz)              | 5       | S21 |
| 33 | The <sup>13</sup> C NMR spectrum in DMSO- <i>d</i> <sub>6</sub> (125 MHz)             | 5       | S21 |
| 34 | The HSQC spectrum in DMSO- <i>d</i> <sub>6</sub> (500 MHz)                            | 5       | S22 |
| 35 | The HMBC spectrum in DMSO- <i>d</i> <sub>6</sub> (500 MHz)                            | 5       | S22 |
| 36 | The UV spectrum in MeOH                                                               | 5       | S23 |
| 37 | The IR spectrum                                                                       | 5       | S23 |
| 38 | The HR-ESI-MS data                                                                    | 5       | S24 |
| 39 | The Gas Chromatographic separation of D-Glc                                           |         | S25 |
| 40 | The Gas Chromatographic separation of D-Api                                           |         | S25 |
| 41 | The Gas Chromatographic analyses of sugar moieties                                    | 4 and 5 | S25 |
| 42 | Sixteen optimized conformations of <b>3Jb</b>                                         |         | S26 |
| 43 | The experimental UV spectrum of <b>3</b> and the calculated UV spectrum of <b>3Jb</b> |         | S29 |
| 44 | Experimental ECD and calculated ECD spectrum of <b>3</b> in MeOH                      | 3       | S30 |

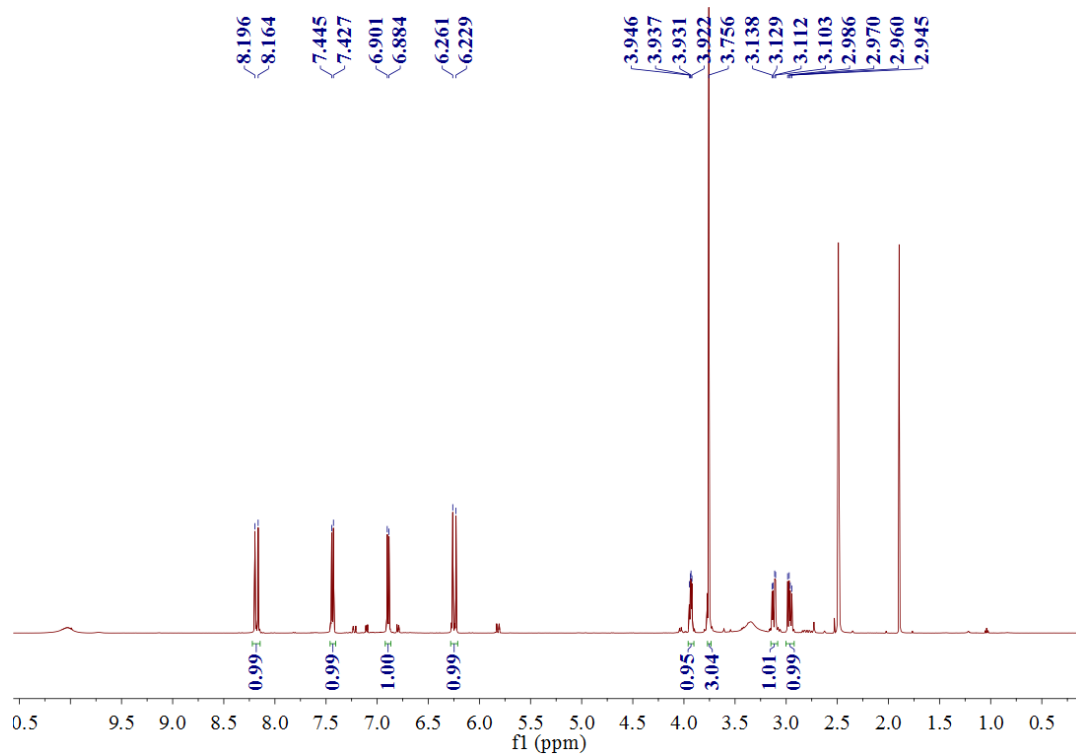

Fig. S1 The  $^1\text{H}$  NMR spectrum of compound **1** in  $\text{DMSO-}d_6$ .

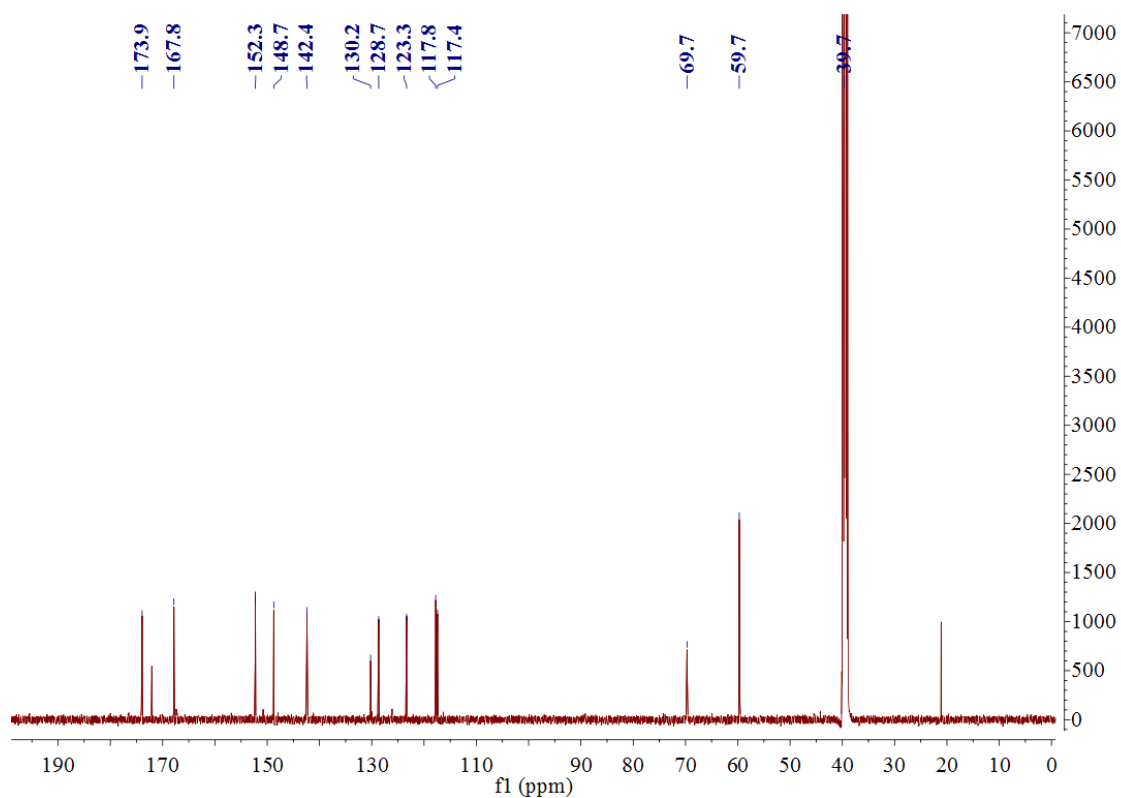

Fig. S2 The  $^{13}\text{C}$  NMR spectrum of compound **1** in  $\text{DMSO-}d_6$ .

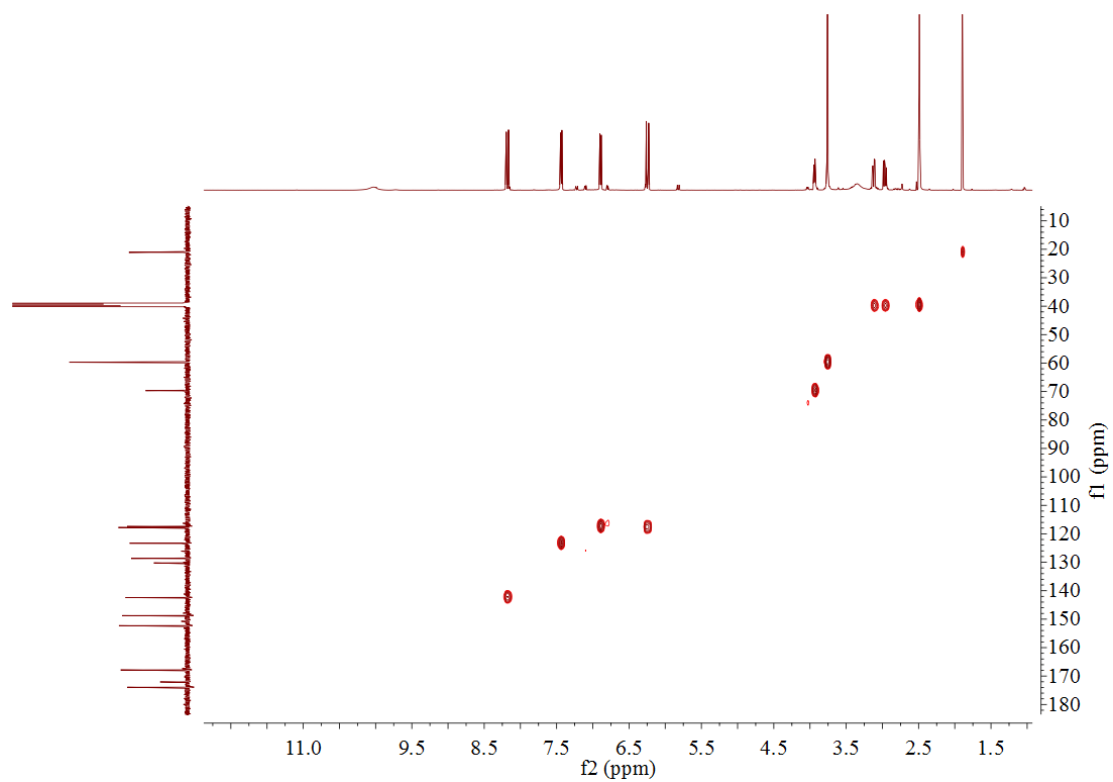

Fig. S3 The HSQC spectrum of compound **1** in DMSO- $d_6$ .

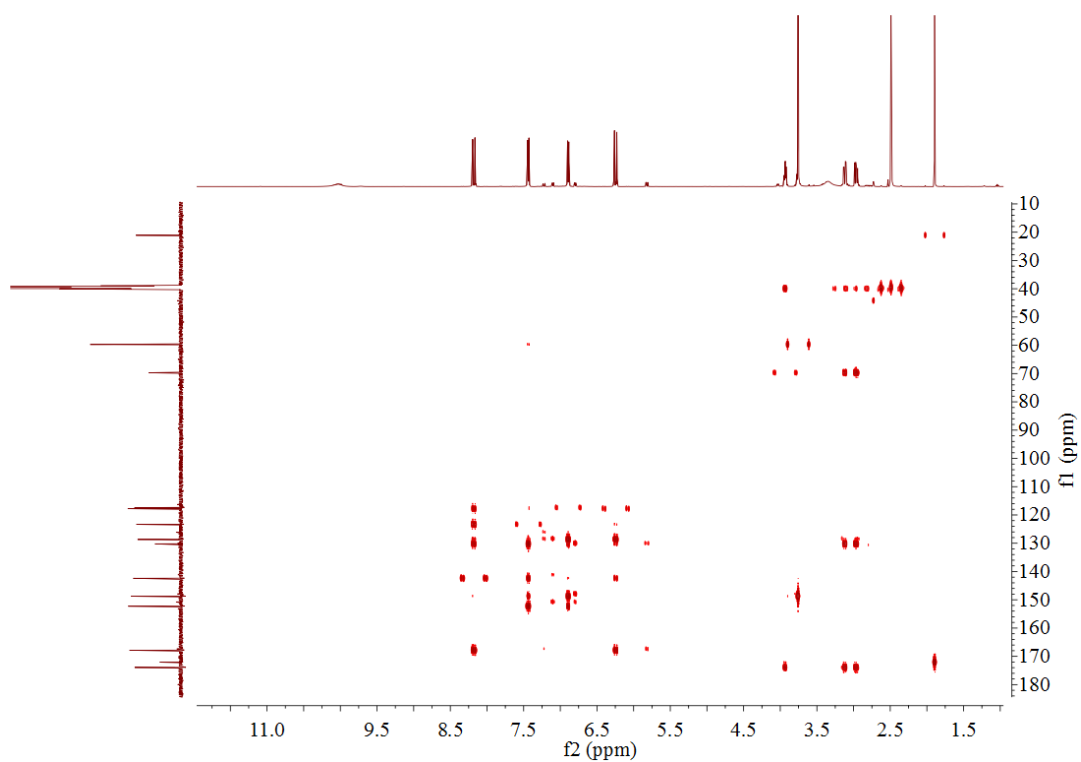

Fig. S4 The HMBC spectrum of compound **1** in DMSO- $d_6$ .

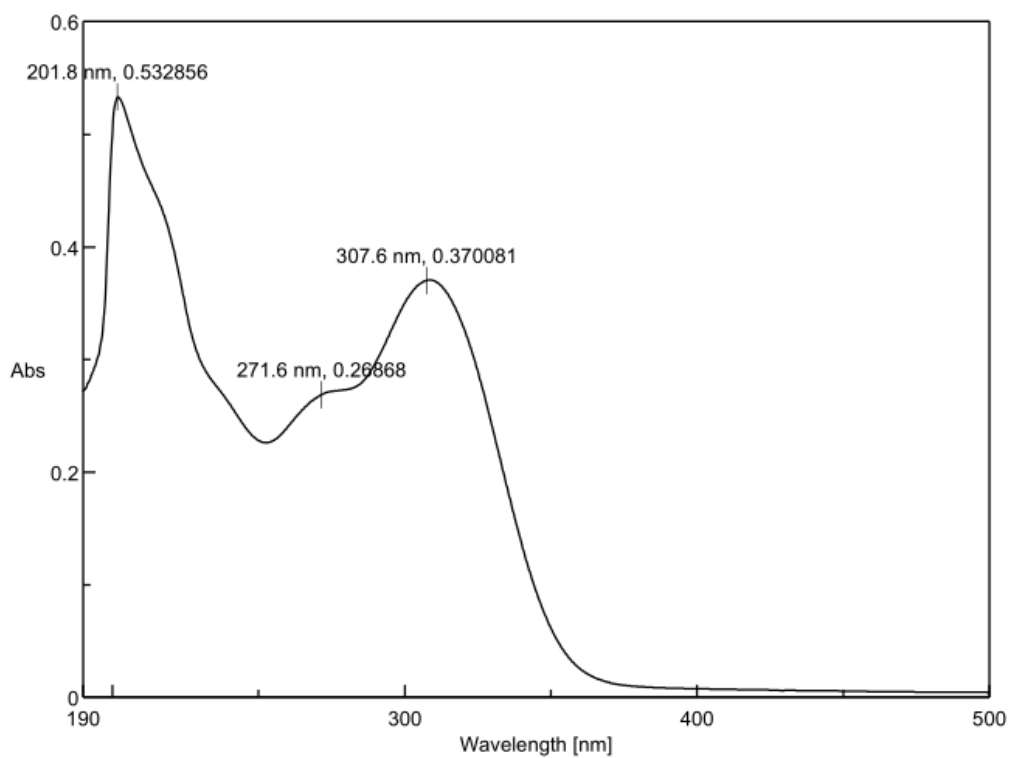

Fig. S5 The UV spectrum of compound **1** in MeOH.

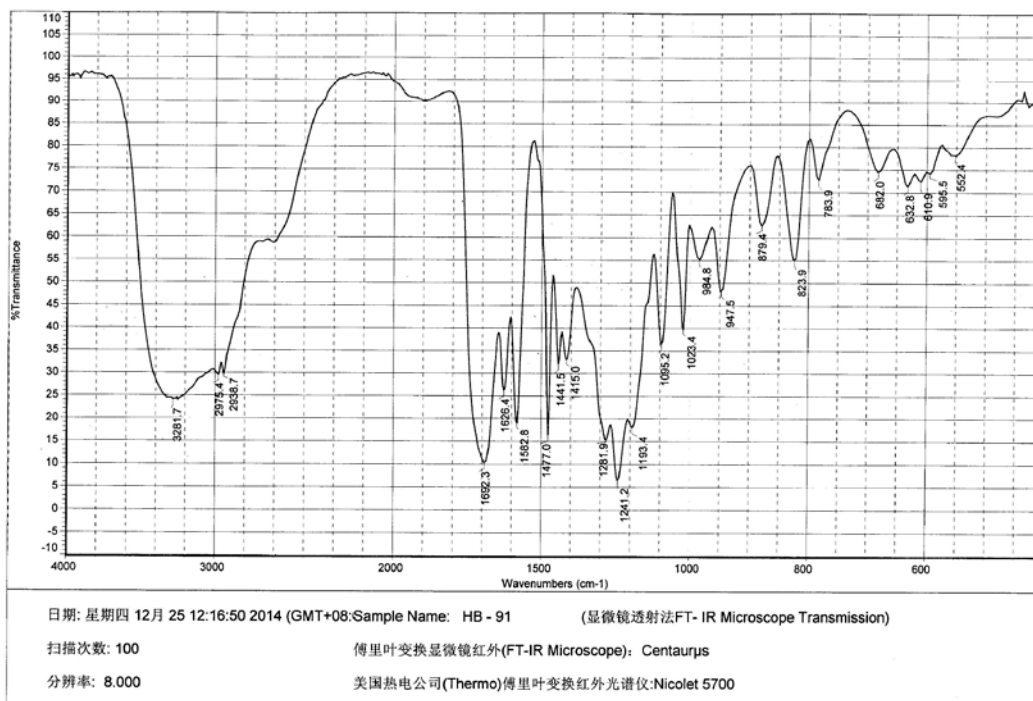

Fig. S6 The IR spectrum of compound **1**.

## Qualitative Analysis Report

|                 |              |                        |            |
|-----------------|--------------|------------------------|------------|
| Data Filename   | 2014121205.d | Sample Name            | HB-91      |
| Sample Type     | Sample       | Position               | P1-C5      |
| Instrument Name | Instrument 1 | User Name              |            |
| Acq Method      | TEST LCMS.m  | IRM Calibration Status | XXXXXXXXXX |
| DA Method       | TEST LCMS.m  | Comment                |            |

### User Chromatograms

Fragmentor Voltage    135    Collision Energy    0    Ionization Mode    ESI

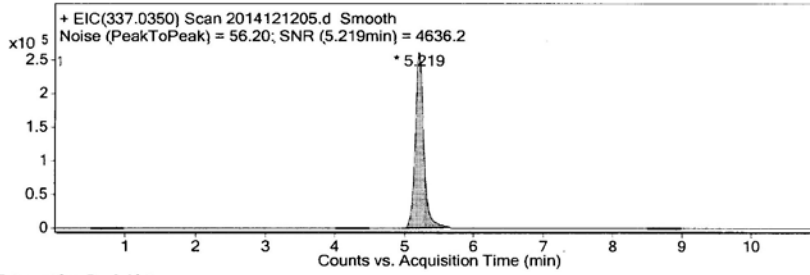

#### Integration Peak List

| Peak | Start | RT    | End   | Height | Area    | Area % | Signal To Noise |
|------|-------|-------|-------|--------|---------|--------|-----------------|
| 1    | 4.977 | 5.219 | 5.653 | 260570 | 2246187 | 100    | 4636.2          |

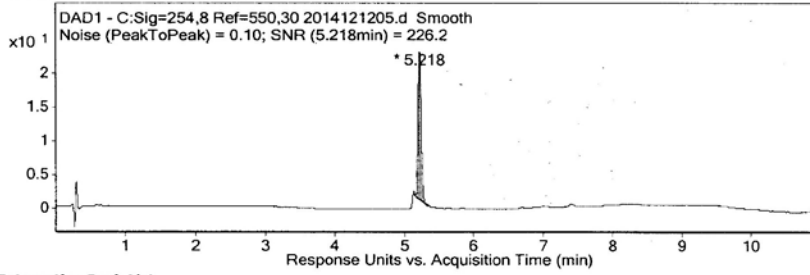

#### Integration Peak List

| Peak | Start | RT    | End   | Height | Area  | Area % | Signal To Noise |
|------|-------|-------|-------|--------|-------|--------|-----------------|
| 1    | 5.163 | 5.218 | 5.364 | 22.04  | 68.36 | 100    | 226.2           |

### User Spectra

Fragmentor Voltage    135    Collision Energy    0    Ionization Mode    ESI

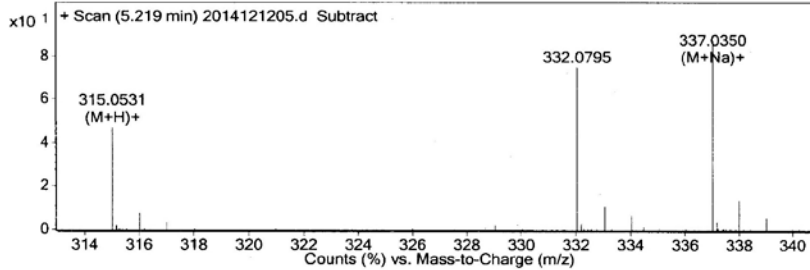

Fig. S7 The HR-ESI-MS data of compound 1.

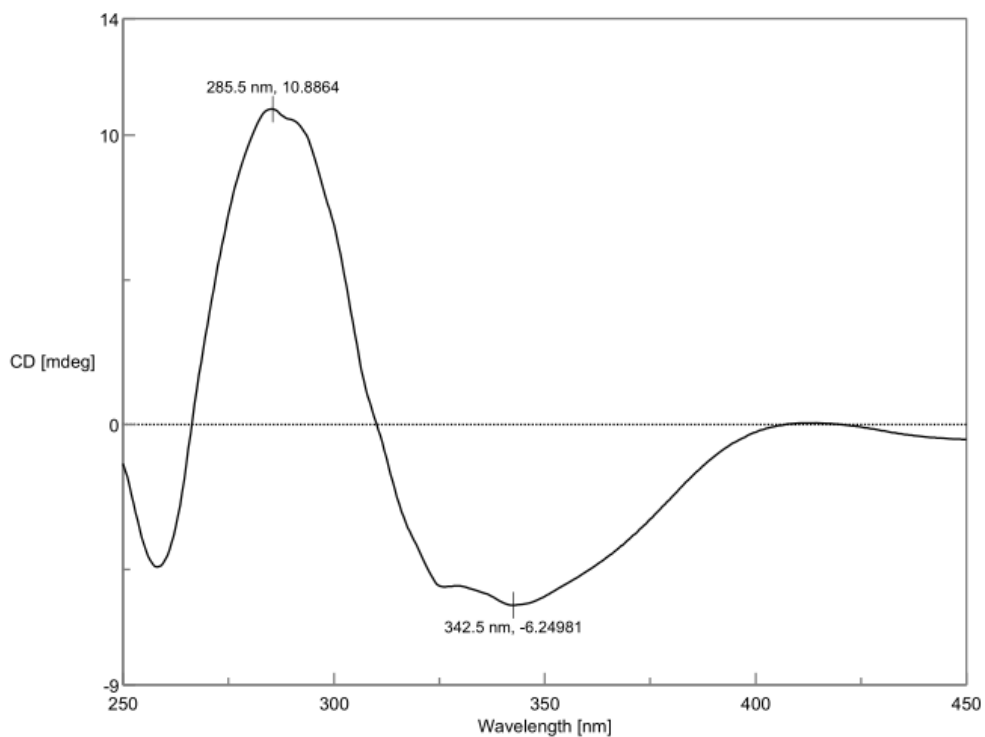

Fig. S8 The  $[\text{Mo}_2(\text{AcO})_4]$  induced ECD spectrum of compound **1** in DMSO.

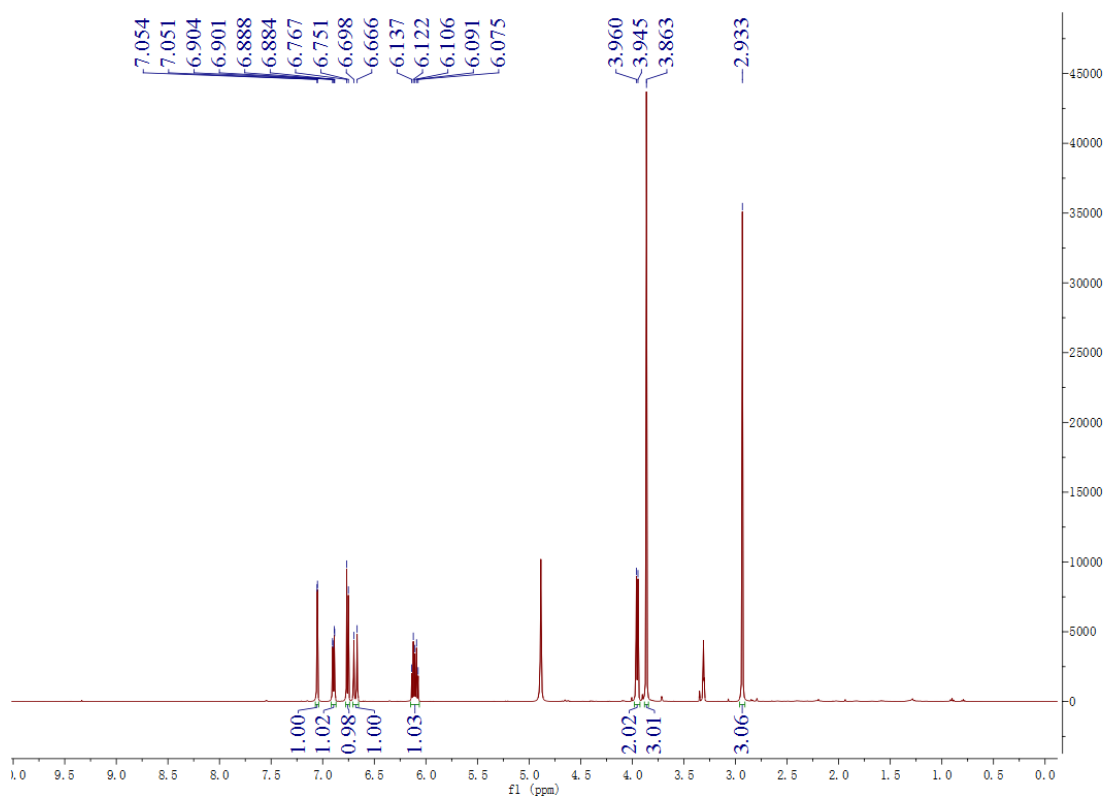

Fig. S9 The  $^1\text{H}$  NMR spectrum of compound **2** in methanol- $d_4$ .

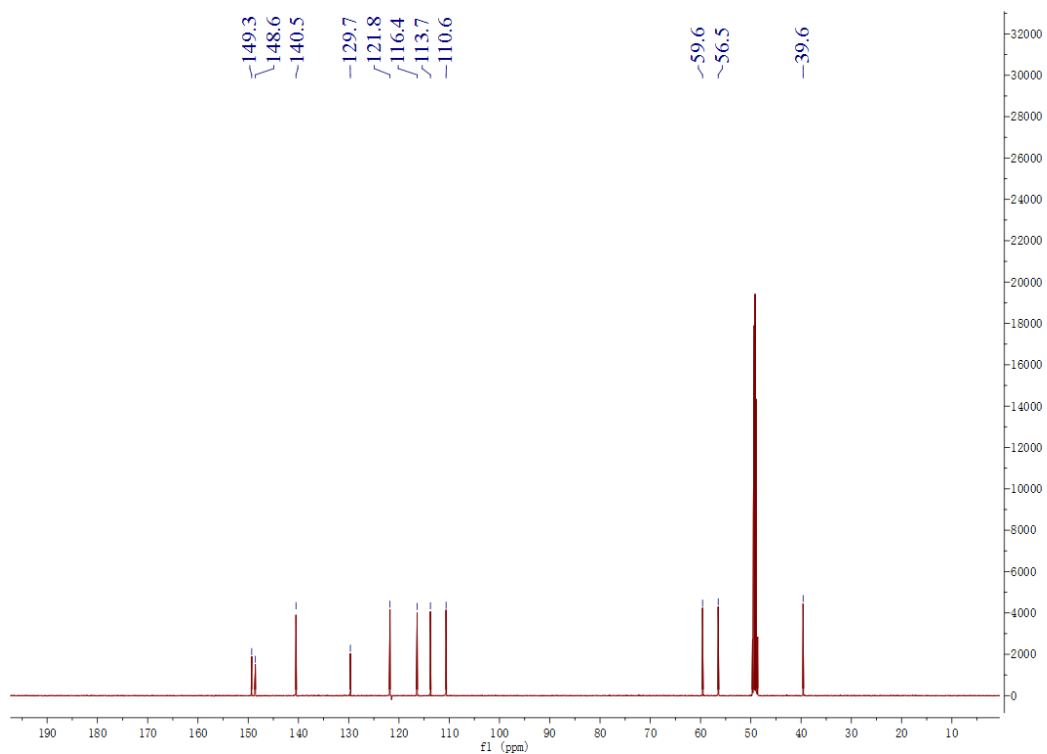

Fig. S10 The  $^{13}\text{C}$  NMR spectrum of compound **2** in methanol- $d_4$ .

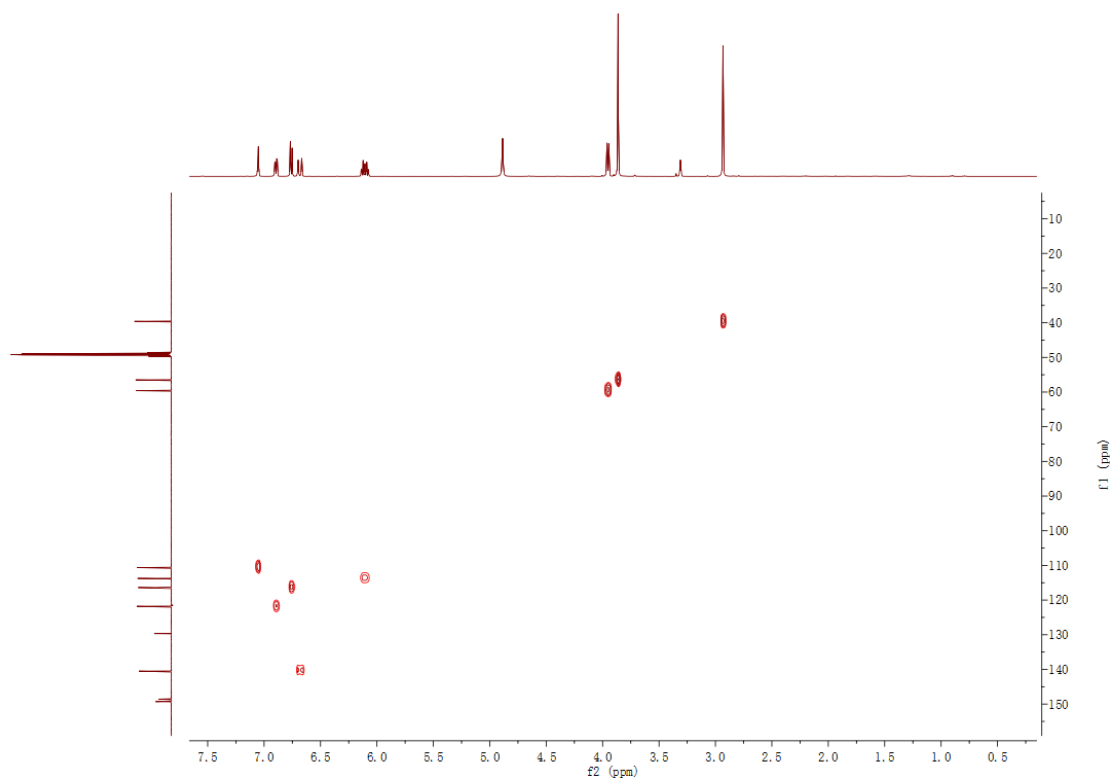

Fig. S11 The HSQC spectrum of compound **2** in methanol- $d_4$ .



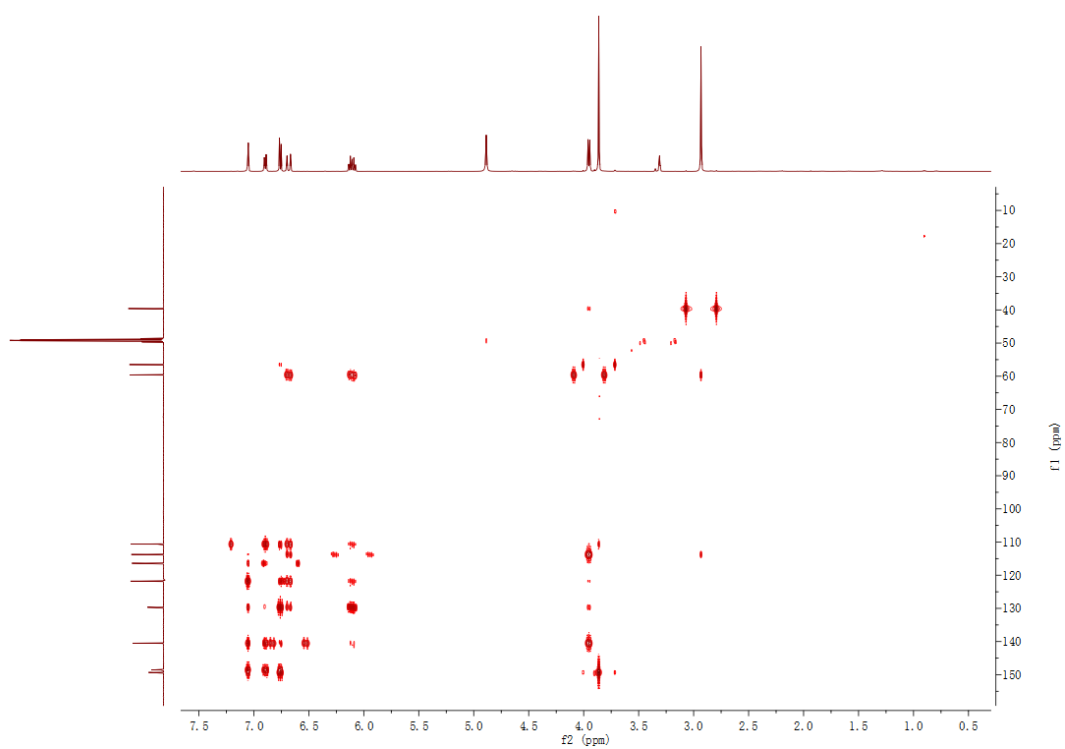

Fig. S12 The HMBC spectrum of compound **2** in methanol- $d_4$ .

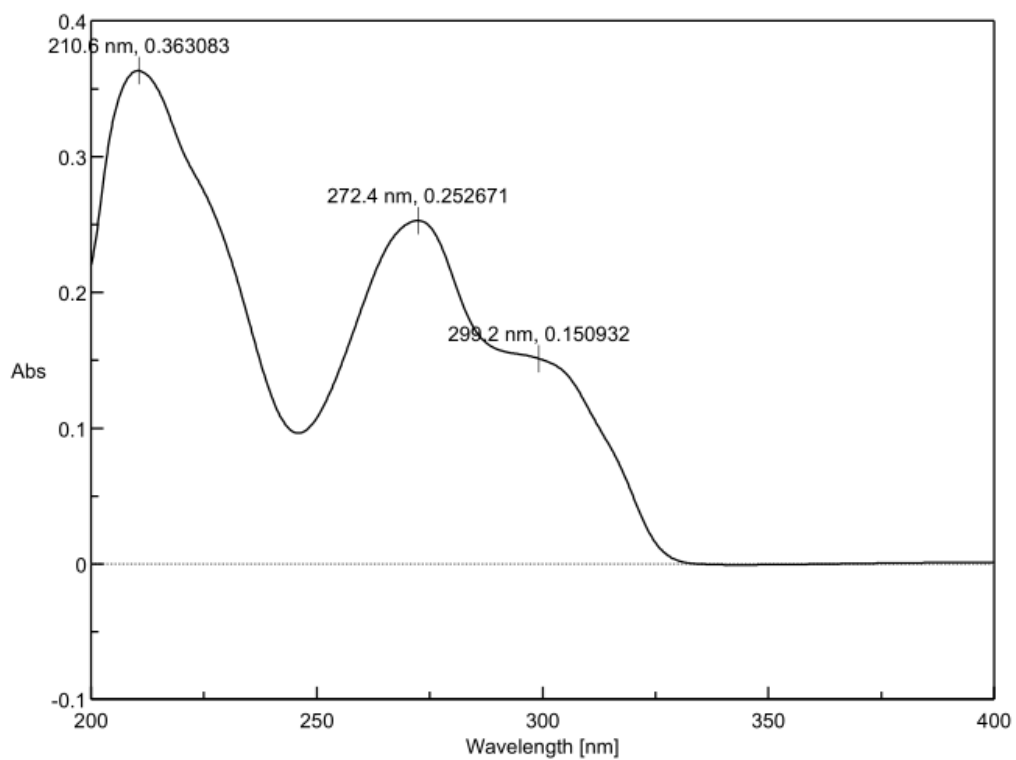

Fig. S13 The UV spectrum of compound **2** in MeOH.

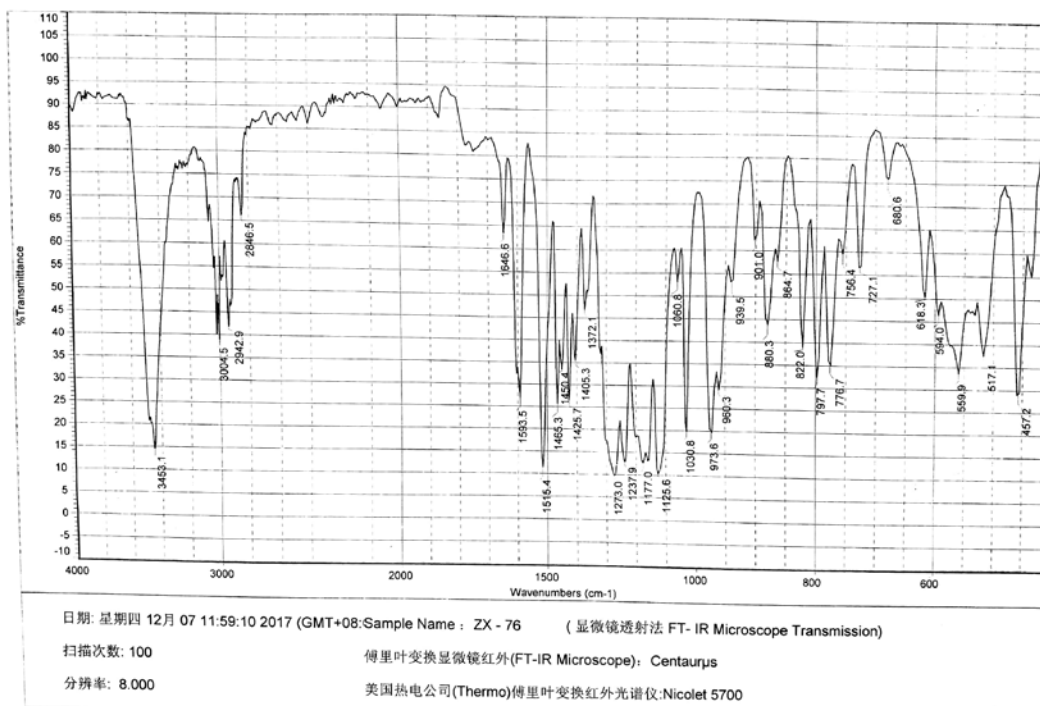

Fig. S14 The IR spectrum of compound **2**.

## Qualitative Analysis Report

|                 |              |                        |         |
|-----------------|--------------|------------------------|---------|
| Data Filename   | 2017053102.d | Sample Name            | ZX-76   |
| Sample Type     | Sample       | Position               | P1-C2   |
| Instrument Name | Instrument 1 | User Name              |         |
| Acq Method      | TEST LCMS.m  | IRM Calibration Status | Success |
| DA Method       | TEST LCMS.m  | Comment                |         |

### User Chromatograms

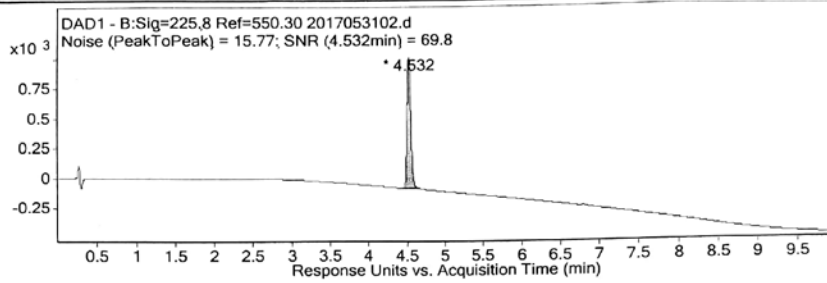

### Integration Peak List

| Peak | Start | RT    | End   | Height | Area    | Area %  | Signal To Noise |      |
|------|-------|-------|-------|--------|---------|---------|-----------------|------|
| 1    | 4.44  | 4.532 | 4.663 | 4.663  | 1100.23 | 3765.91 | 100             | 69.8 |

Fragmentor Voltage 150    Collision Energy 0    Ionization Mode ESI

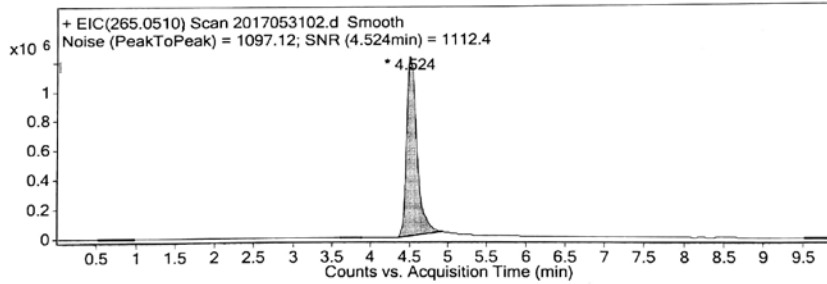

### Integration Peak List

| Peak | Start | RT    | End   | Height  | Area     | Area % | Signal To Noise |
|------|-------|-------|-------|---------|----------|--------|-----------------|
| 1    | 4.347 | 4.524 | 4.927 | 1220411 | 11509860 | 100    | 1112.4          |

### User Spectra

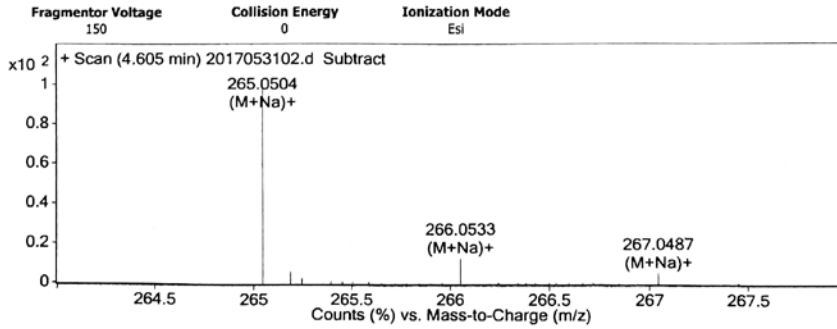

Fig. S15 The HR-ESI-MS data of compound 2.

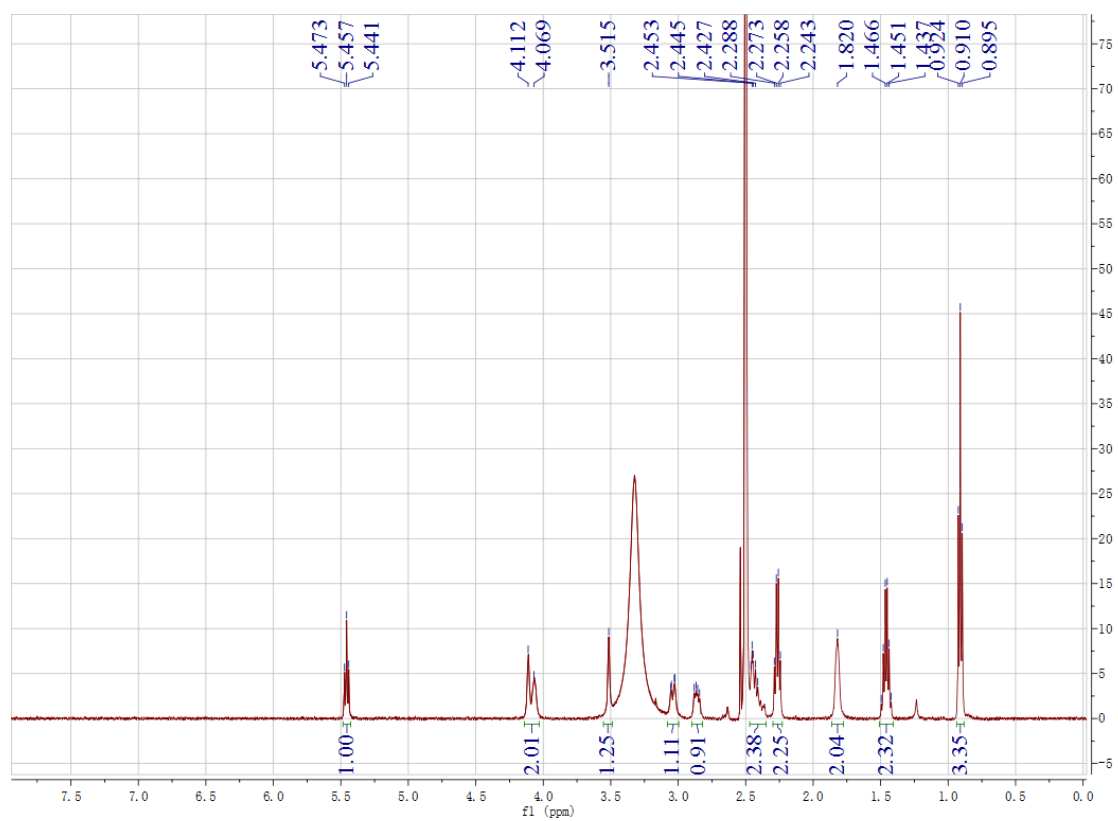

Fig. S16 The  $^1\text{H}$  NMR spectrum of compound **3** in  $\text{DMSO-}d_6$ .

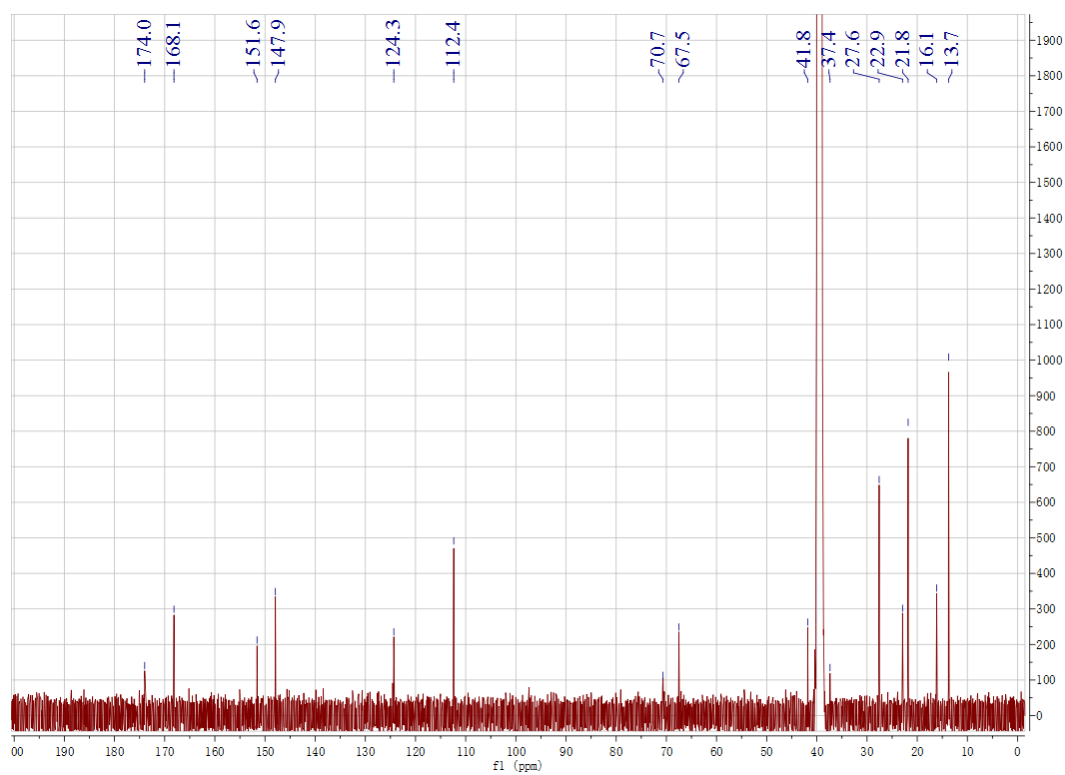

Fig. S17 The  $^{13}\text{C}$  NMR spectrum of compound **3** in  $\text{DMSO-}d_6$ .

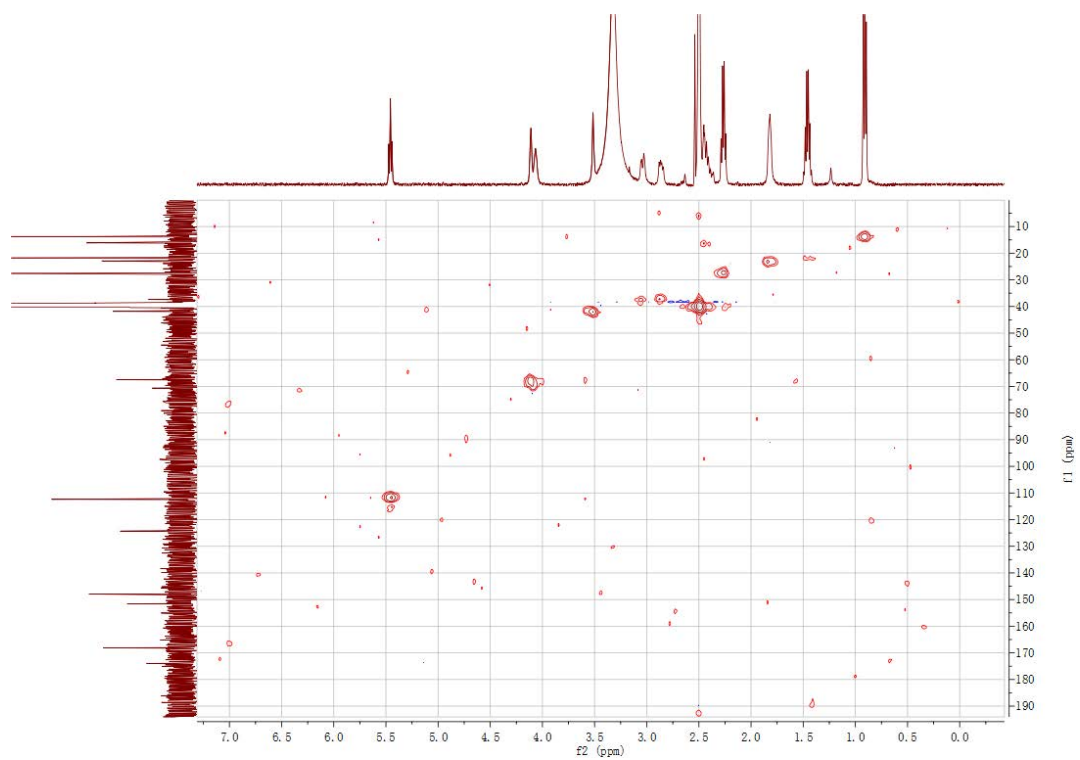

Fig. S18 The HSQC spectrum of compound **3** in DMSO- $d_6$ .

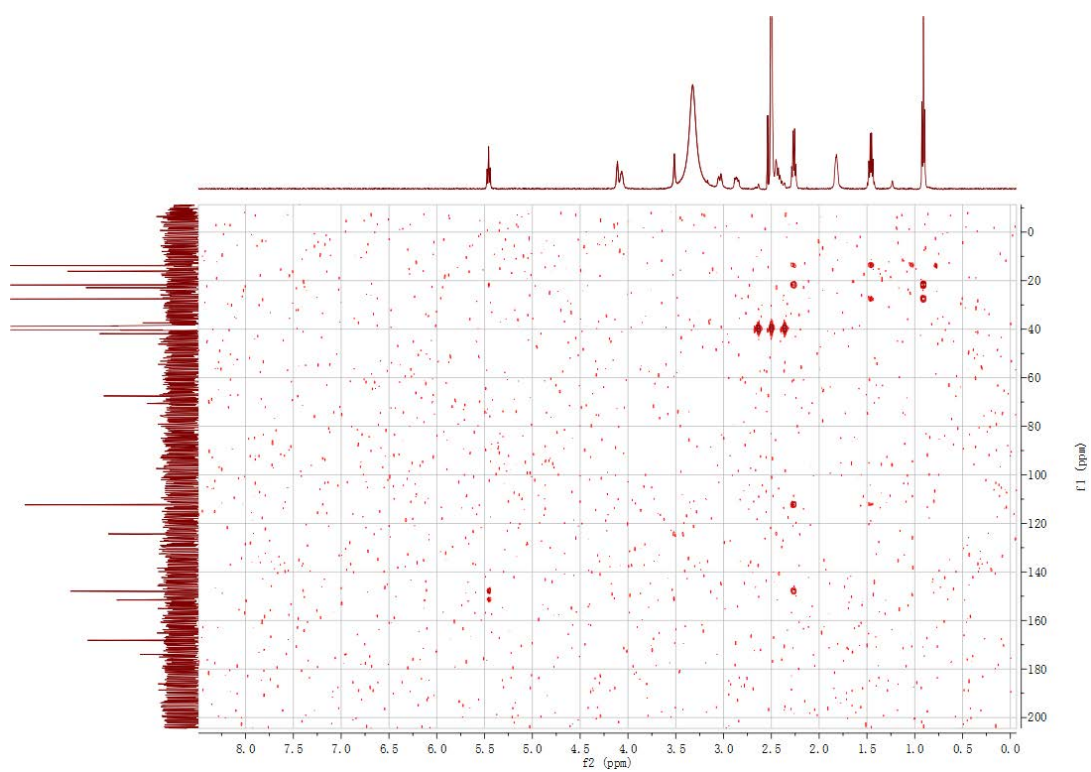

Fig. S19 The HMBC spectrum of compound **3** in DMSO- $d_6$ .

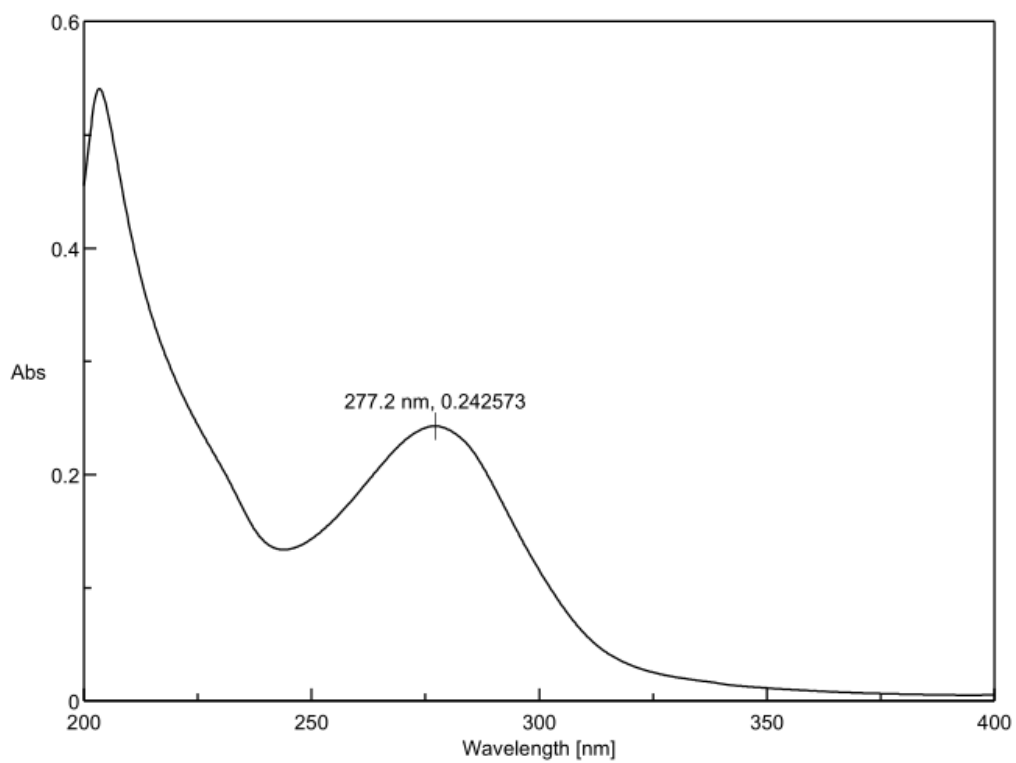

Fig. S20 The UV spectrum of compound **3** in MeOH.

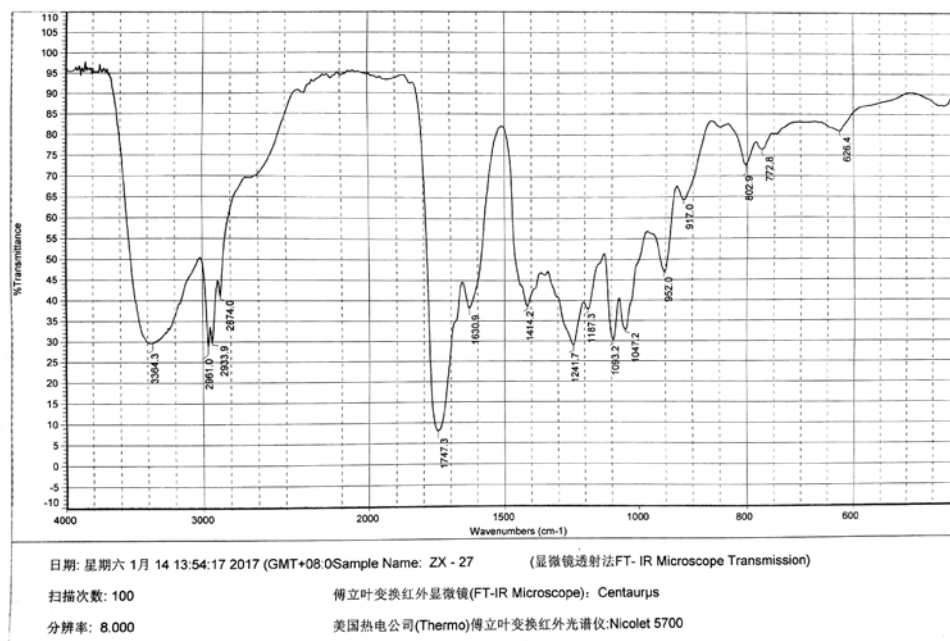

Fig. S21 The IR spectrum of compound **3**.

## Qualitative Analysis Report

|                        |              |                               |         |
|------------------------|--------------|-------------------------------|---------|
| <b>Data Filename</b>   | 2016122905.d | <b>Sample Name</b>            | ZX-27   |
| <b>Sample Type</b>     | Sample       | <b>Position</b>               | P1-C5   |
| <b>Instrument Name</b> | Instrument 1 | <b>User Name</b>              |         |
| <b>Acq Method</b>      |              | <b>IRM Calibration Status</b> | Success |
| <b>DA Method</b>       | TEST LCMS.m  | <b>Comment</b>                |         |

### User Chromatograms

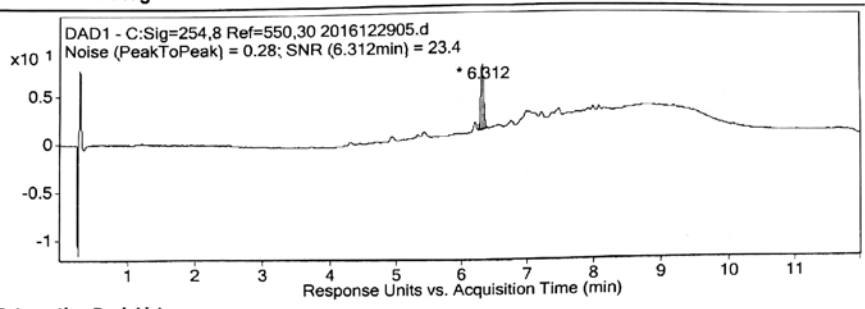

| Peak | Start | RT    | End   | Height | Area  | Area % | Signal To Noise |
|------|-------|-------|-------|--------|-------|--------|-----------------|
| 1    | 6.25  | 6.312 | 6.403 | 6.6    | 20.29 | 100    | 23.4            |

Fragmentor Voltage 150    Collision Energy 0    Ionization Mode ESI

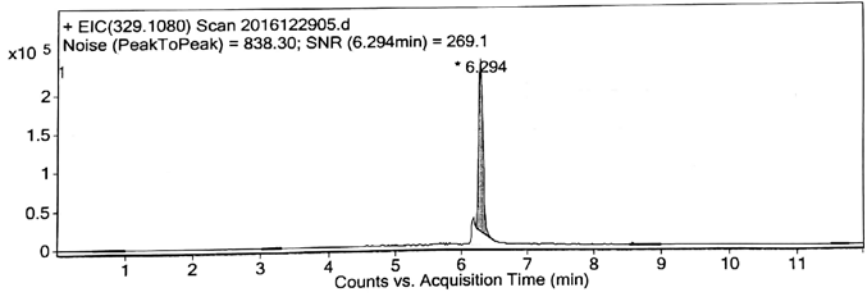

| Peak | Start | RT    | End   | Height | Area    | Area % | Signal To Noise |
|------|-------|-------|-------|--------|---------|--------|-----------------|
| 1    | 6.23  | 6.294 | 6.536 | 225603 | 1003771 | 100    | 269.1           |

### User Spectra

Fragmentor Voltage 150    Collision Energy 0    Ionization Mode ESI

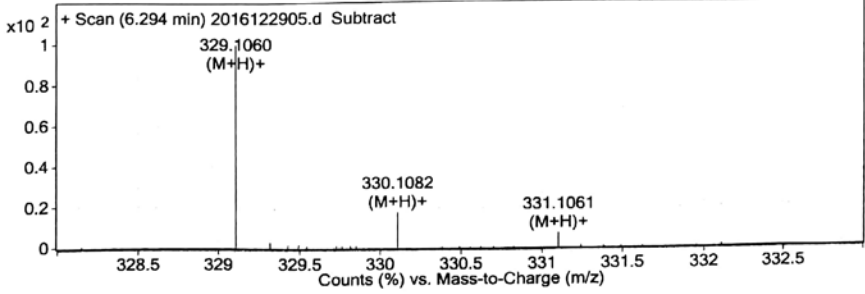

Fig. S22 The HR-ESI-MS data of compound 3.

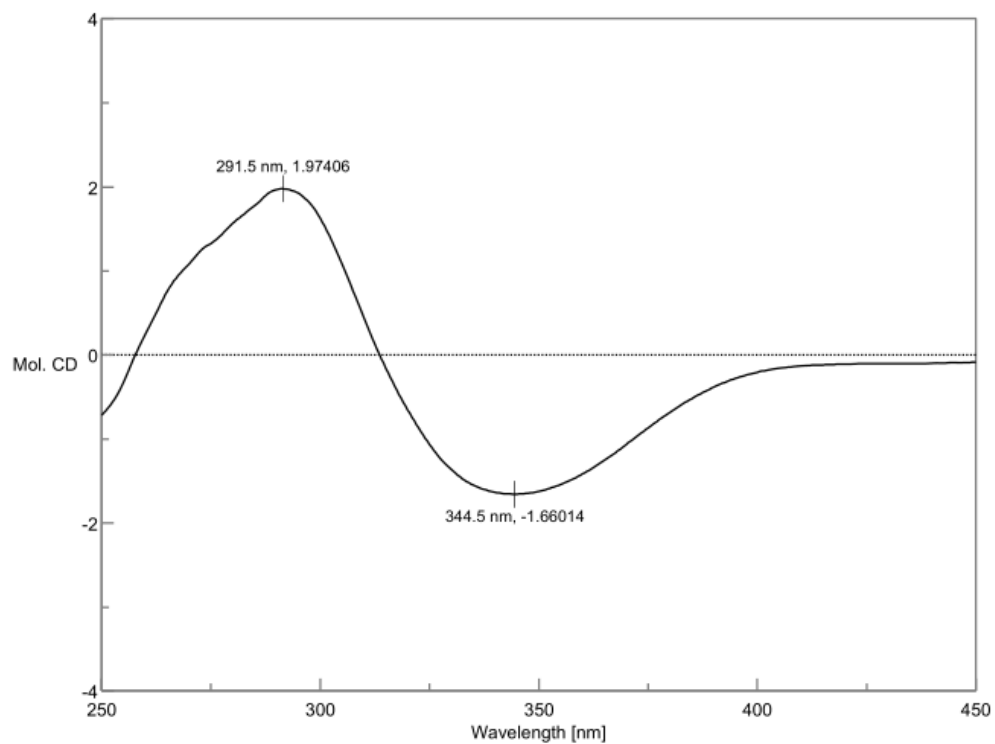

Fig. S23 The  $[\text{Mo}_2(\text{AcO})_4]$  induced ECD spectrum of compound **3** in DMSO.

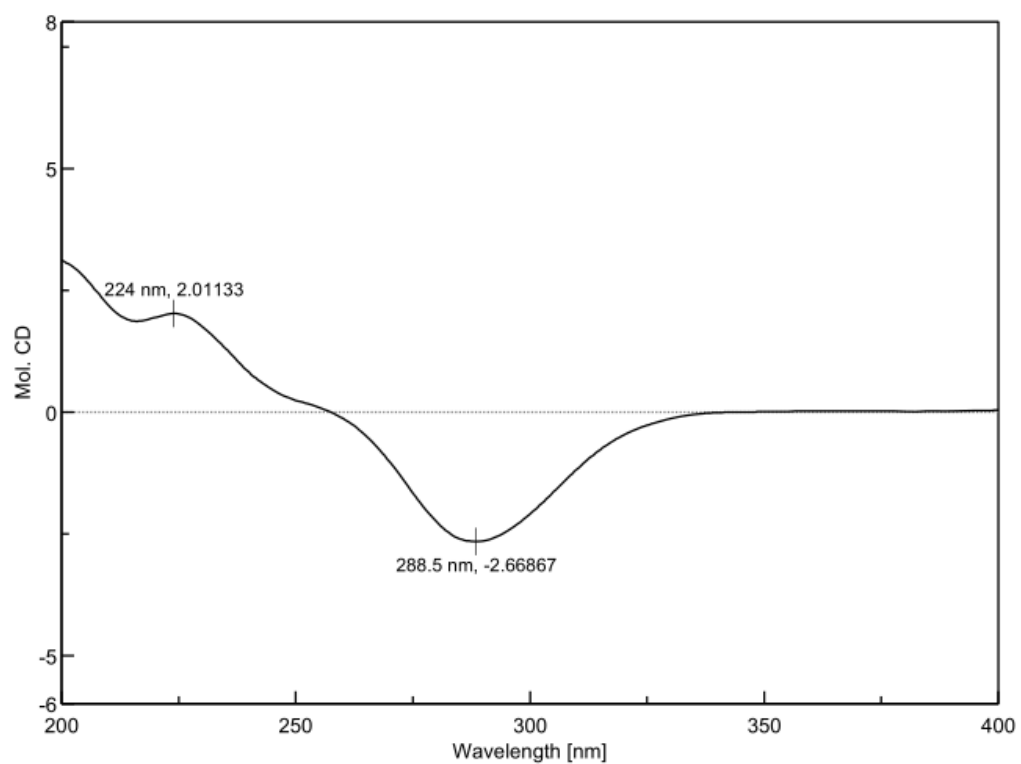

Fig. S24 The ECD spectrum of compound **3** in MeOH.



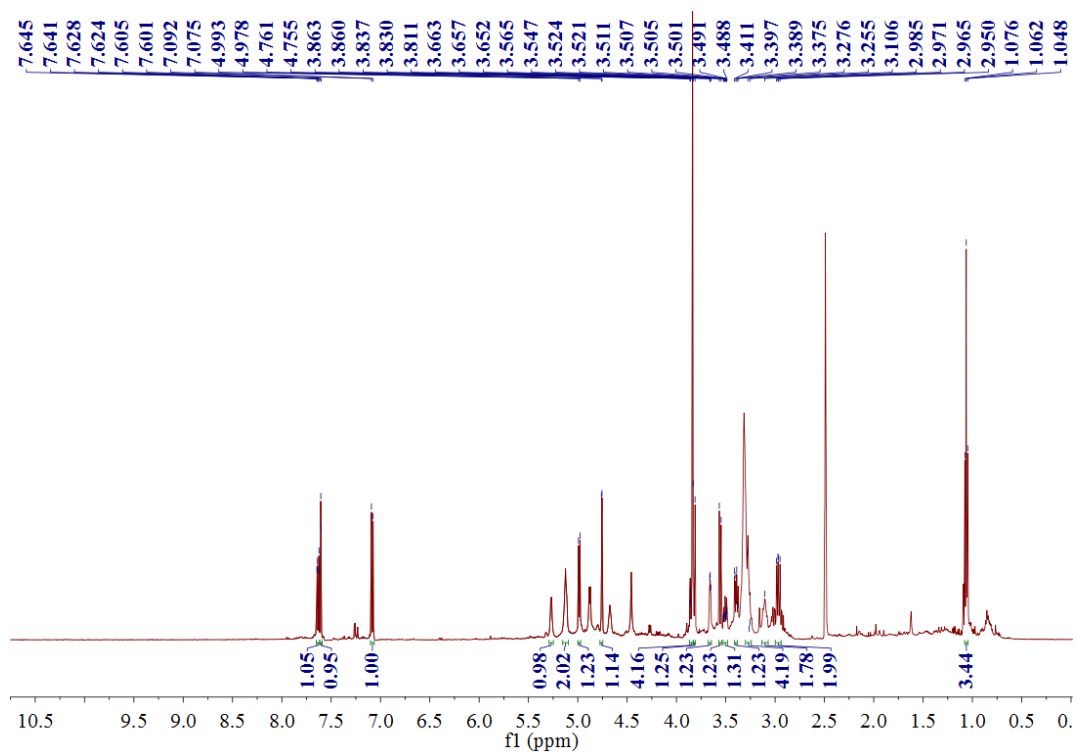

Fig. S25 The  $^1\text{H}$  NMR spectrum of compound **4** in  $\text{DMSO-}d_6$ .

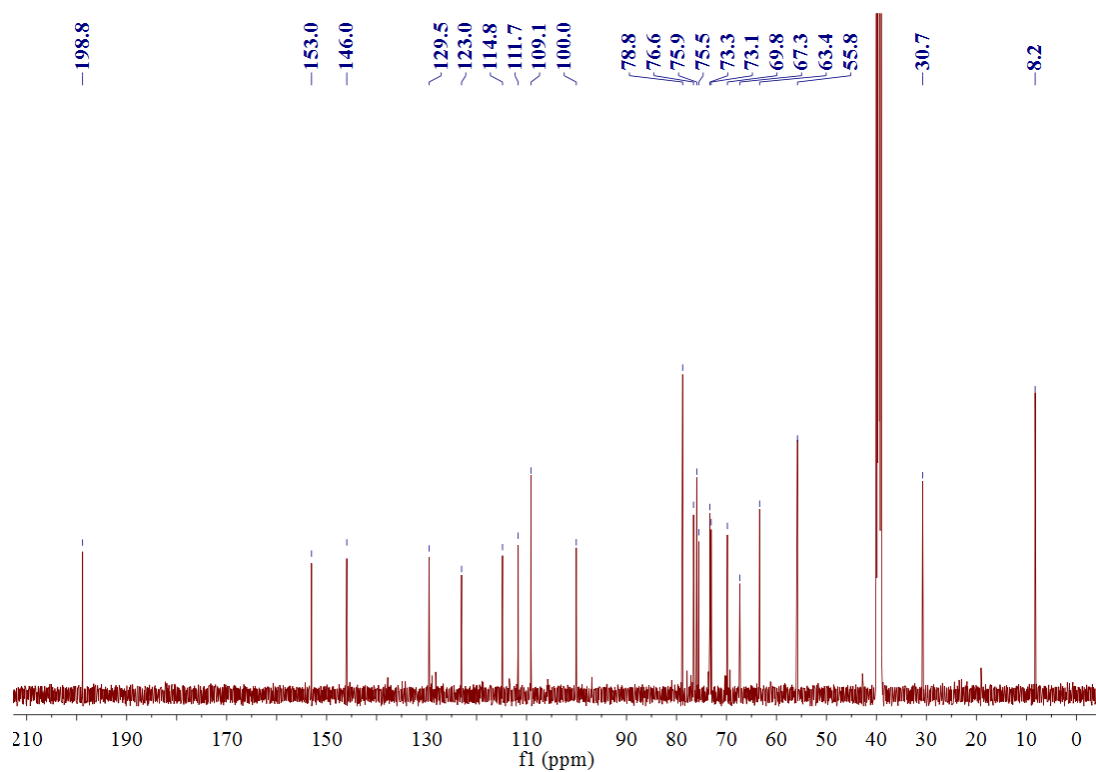

Fig. S26 The  $^{13}\text{C}$  NMR spectrum of compound **4** in  $\text{DMSO-}d_6$ .

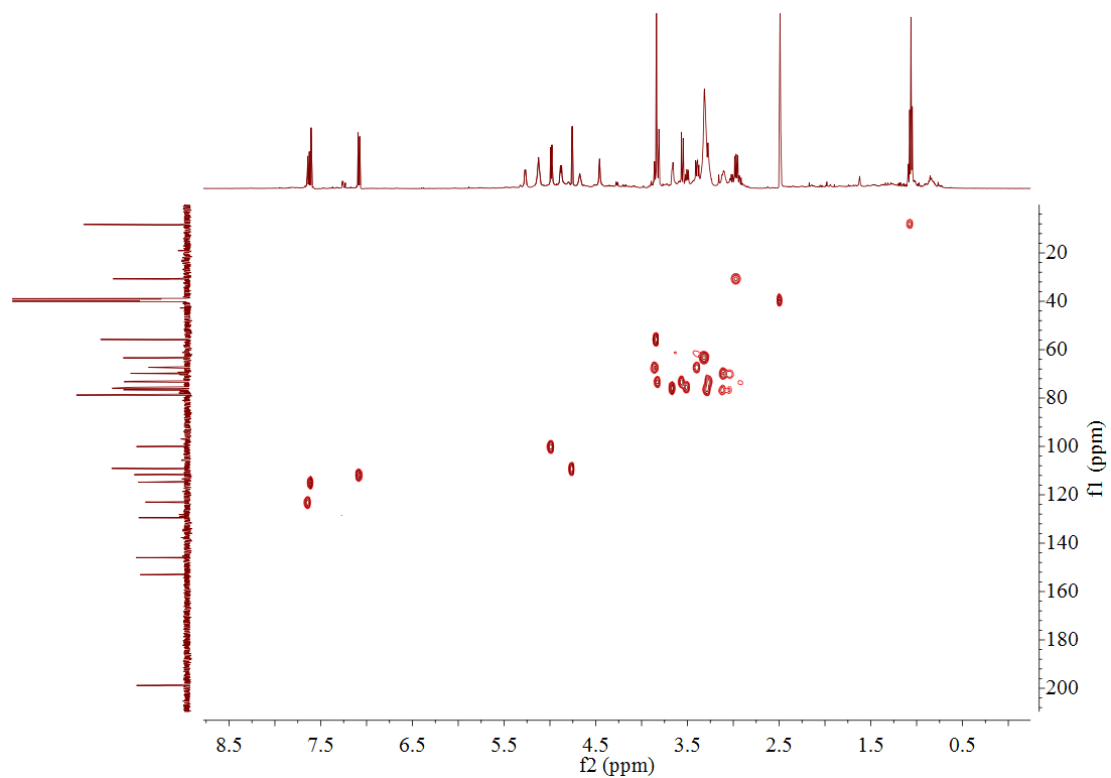

Fig. S27 The HSQC spectrum of compound **4** in DMSO-*d*<sub>6</sub>.

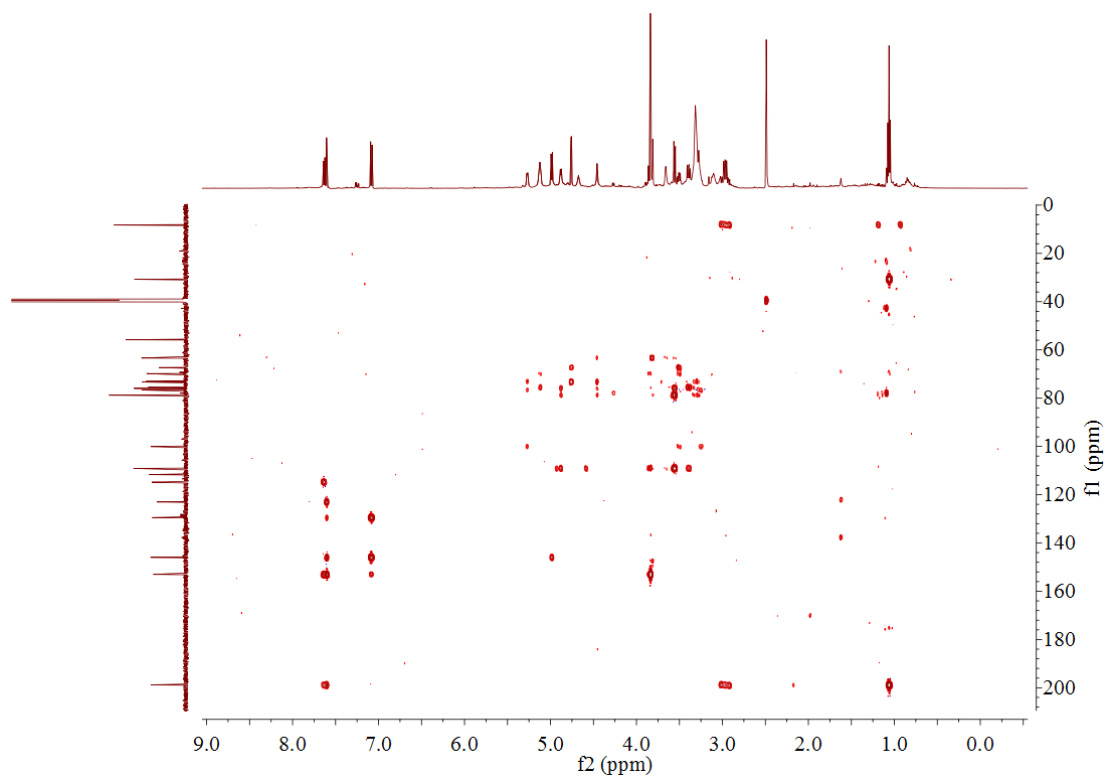

Fig. S28 The HMBC spectrum of compound **4** in DMSO-*d*<sub>6</sub>.

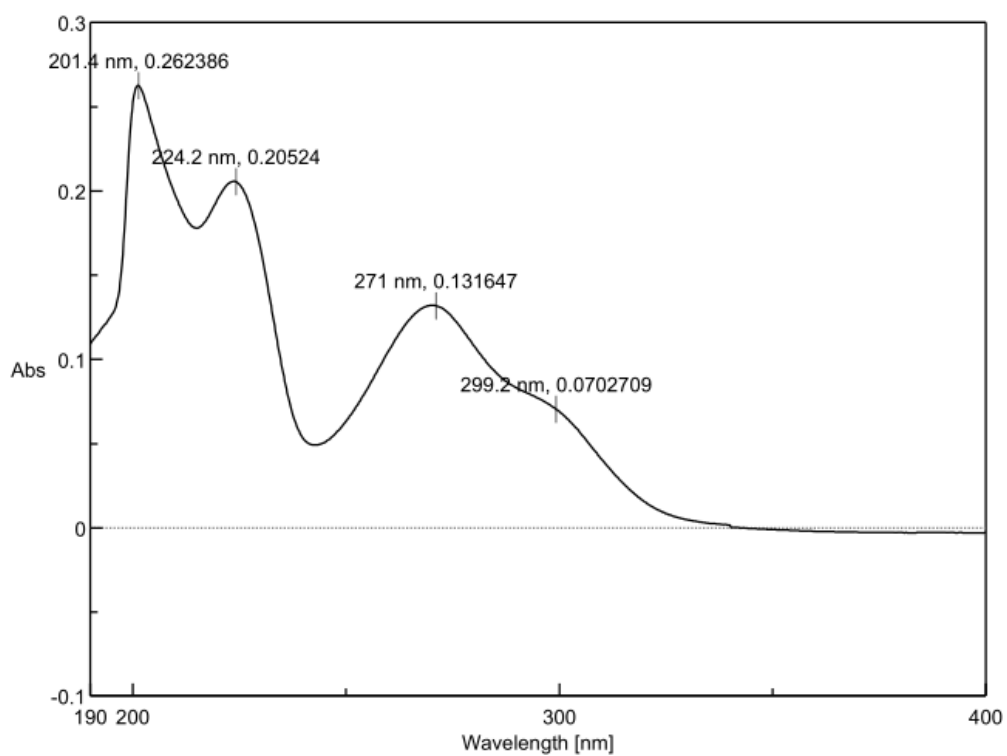

Fig. S29 The UV spectrum of compound 4 in MeOH.

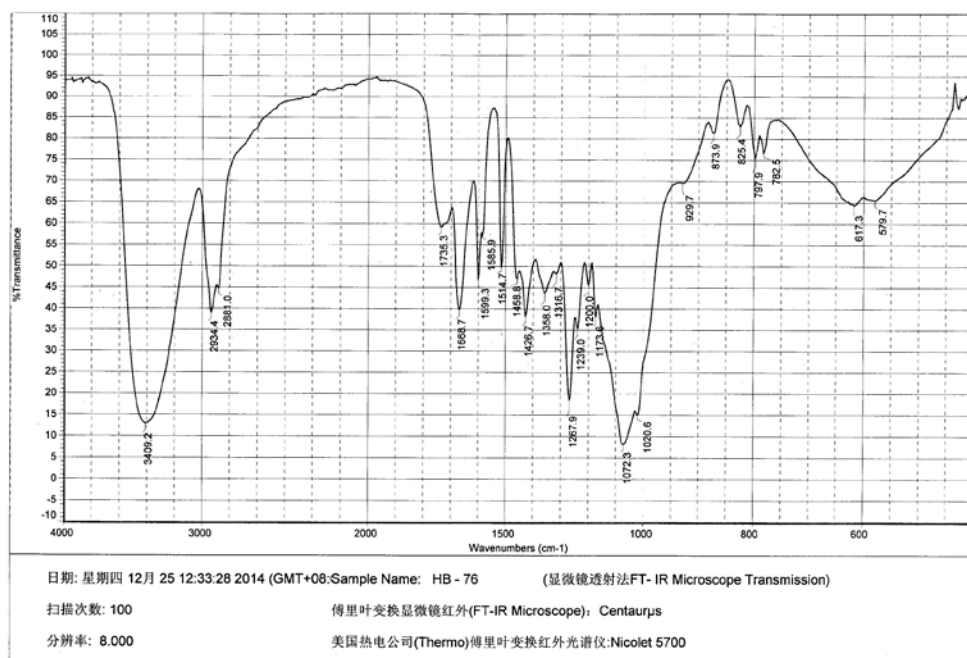

Fig. S30 The IR spectrum of compound 4.

## Qualitative Analysis Report

|                 |              |                        |            |
|-----------------|--------------|------------------------|------------|
| Data Filename   | 2014102303.d | Sample Name            | HB-76      |
| Sample Type     | Sample       | Position               | P1-C3      |
| Instrument Name | Instrument 1 | User Name              |            |
| Acq Method      | TEST LCMS.m  | IRM Calibration Status | ██████████ |
| DA Method       | TEST LCMS.m  | Comment                |            |

### User Chromatograms

Fragmentor Voltage 135    Collision Energy 0    Ionization Mode ESI

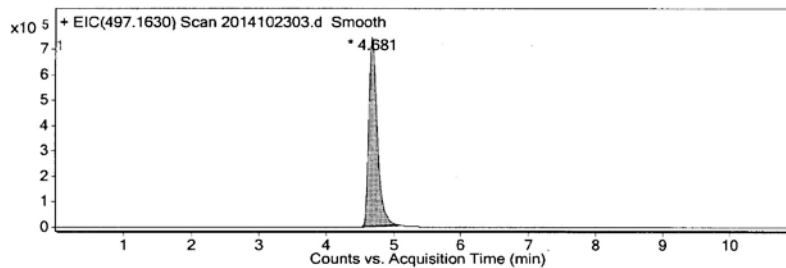

#### Integration Peak List

| Peak | Start | RT    | End | Height | Area    | Area % |
|------|-------|-------|-----|--------|---------|--------|
| 1    | 4.52  | 4.681 | 5.1 | 743357 | 6584825 | 100    |

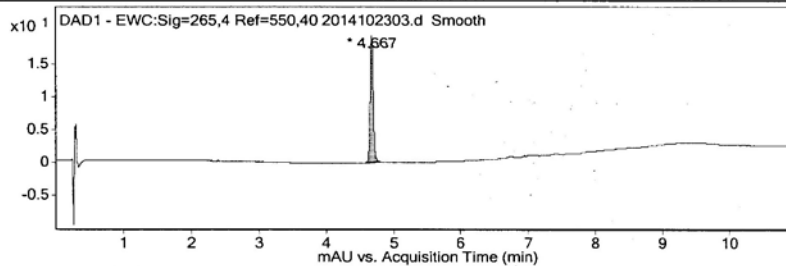

#### Integration Peak List

| Peak | Start | RT    | End   | Height | Area   | Area % |
|------|-------|-------|-------|--------|--------|--------|
| 1    | 4.58  | 4.667 | 4.793 | 19.43  | 62.639 | 100    |

### User Spectra

Fragmentor Voltage 135    Collision Energy 0    Ionization Mode ESI

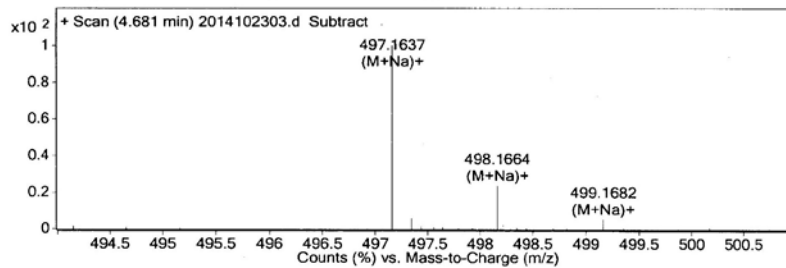

Fig. S31 The HR-ESI-MS data of compound 4.

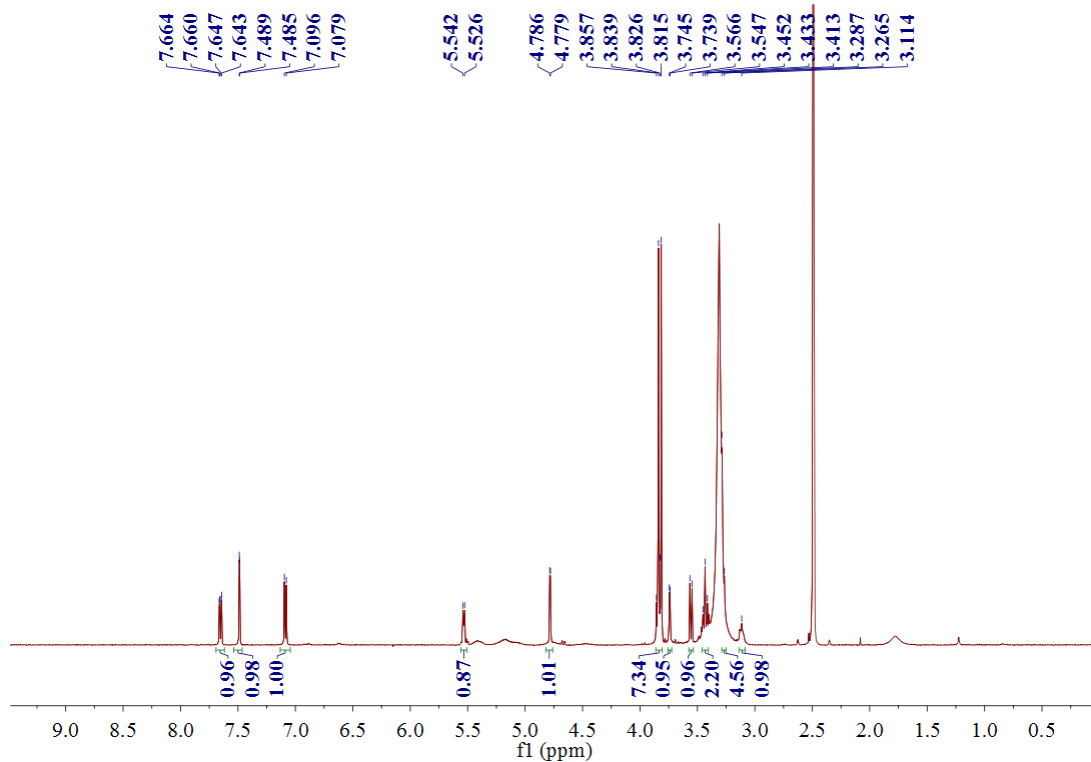

Fig. S32 The  $^1\text{H}$  NMR spectrum of compound **5** in  $\text{DMSO-}d_6$ .

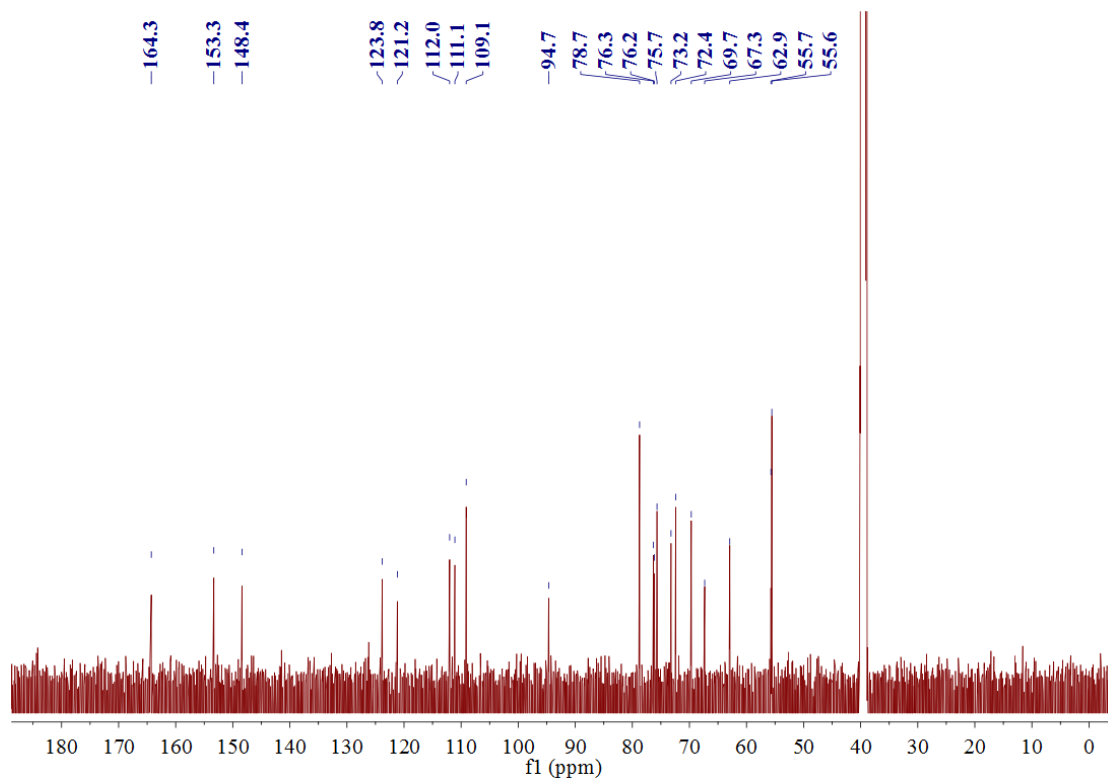

Fig. S33 The  $^{13}\text{C}$  NMR spectrum of compound **5** in  $\text{DMSO-}d_6$ .

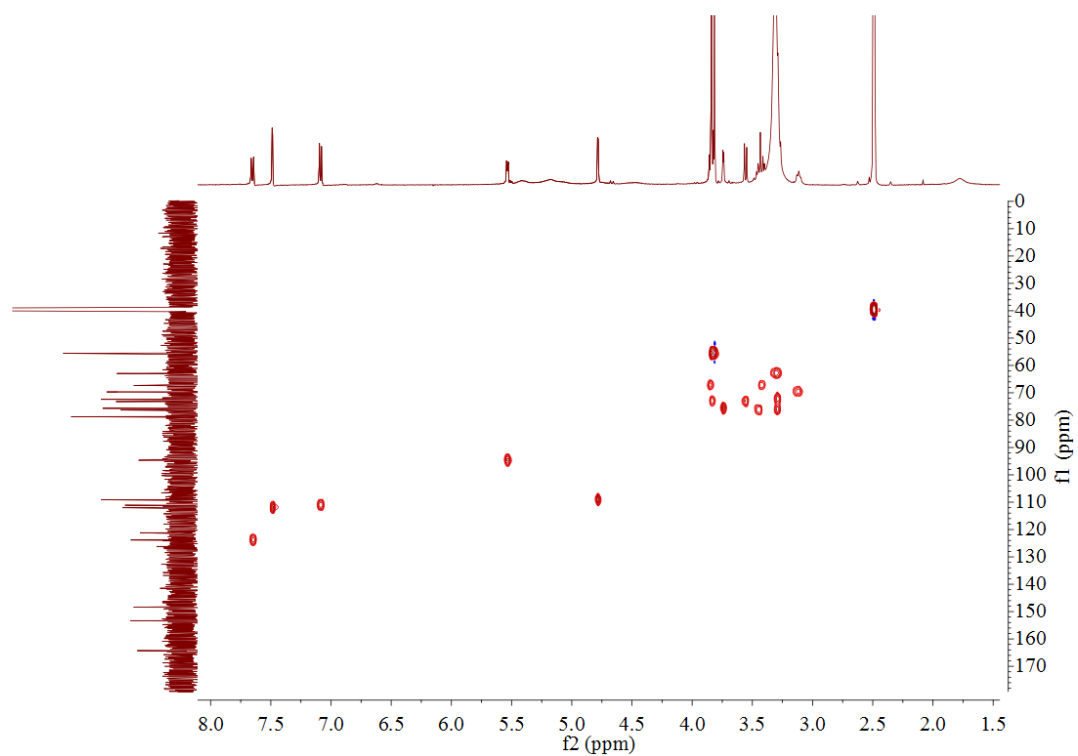

Fig. S34 The HSQC spectrum of compound **5** in DMSO- $d_6$ .

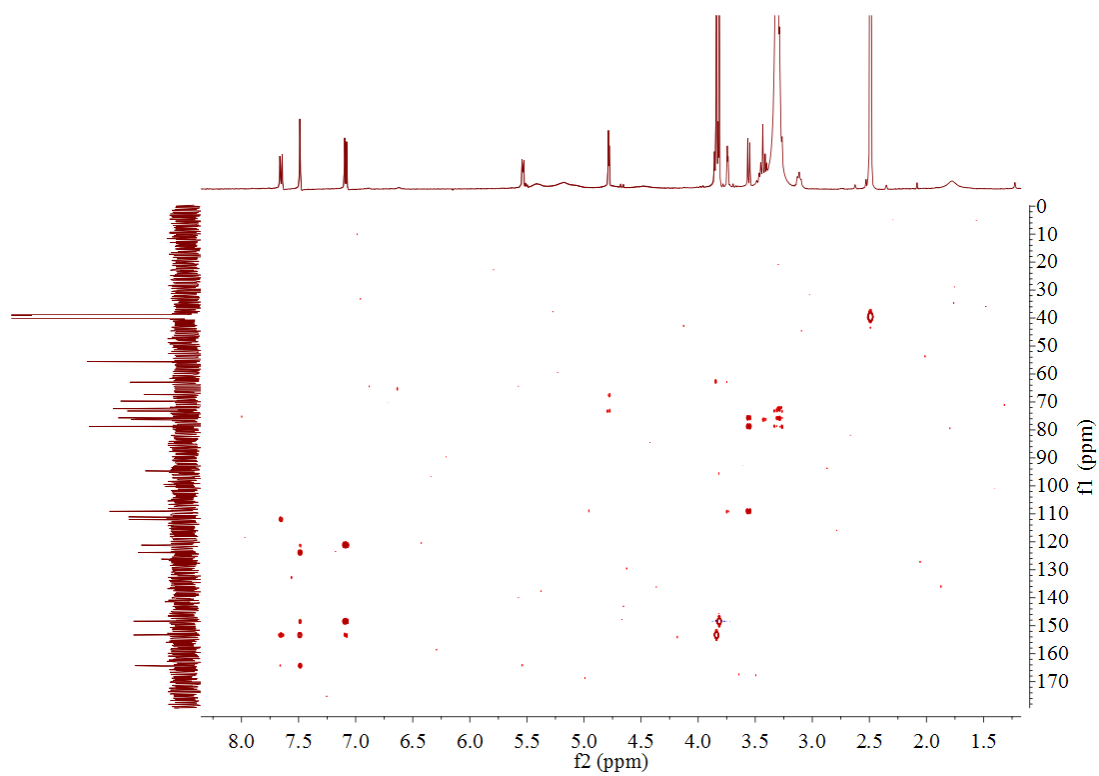

Fig. S35 The HMBC spectrum of compound **5** in DMSO- $d_6$ .

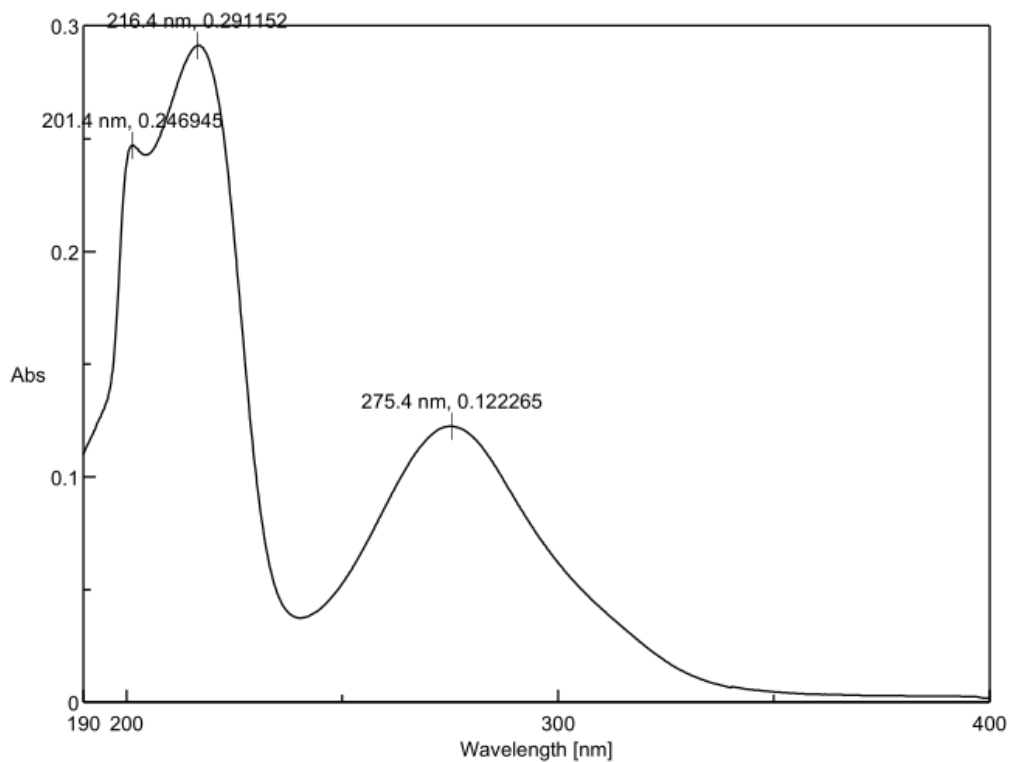

Fig. S36 The UV spectrum of compound **5** in MeOH.

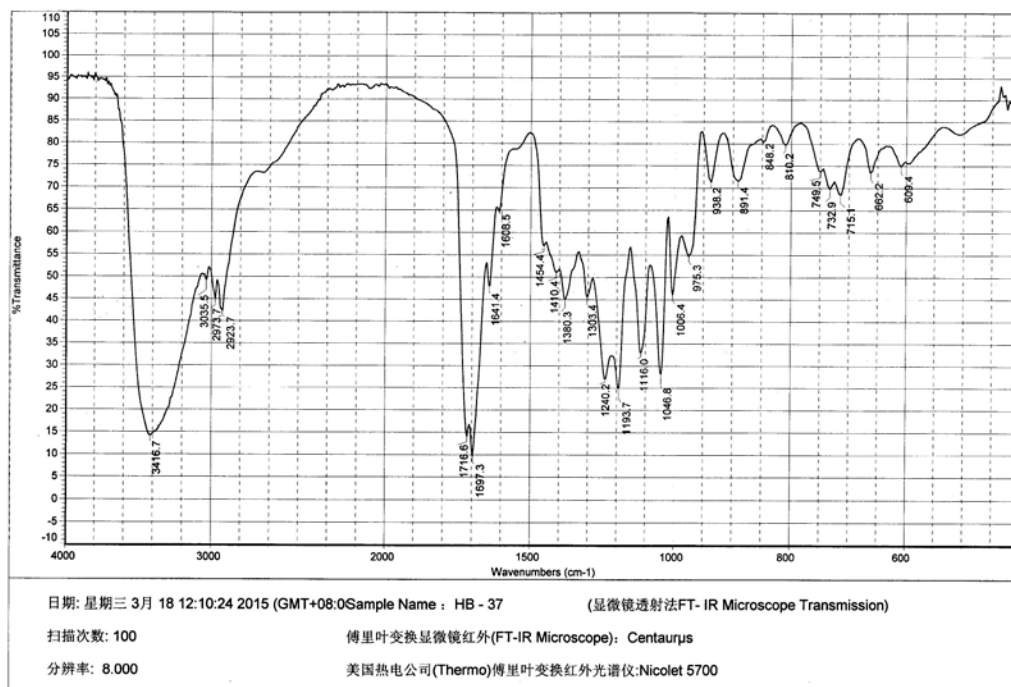

Fig. S37 The IR spectrum of compound **5**.

## Qualitative Analysis Report

|                 |              |                        |            |
|-----------------|--------------|------------------------|------------|
| Data Filename   | 2014102301.d | Sample Name            | HB-37      |
| Sample Type     | Sample       | Position               | P1-C1      |
| Instrument Name | Instrument 1 | User Name              |            |
| Acq Method      | TEST LCMS.m  | IRM Calibration Status | XXXXXXXXXX |
| DA Method       | TEST LCMS.m  | Comment                |            |

### User Chromatograms

Fragmentor Voltage 135    Collision Energy 0    Ionization Mode ESI

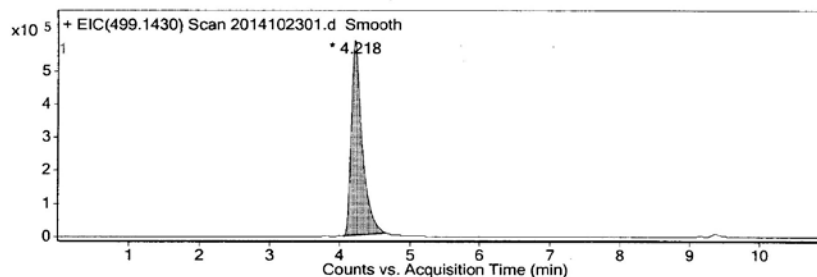

#### Integration Peak List

| Peak | Start | RT    | End   | Height | Area    | Area % |
|------|-------|-------|-------|--------|---------|--------|
| 1    | 4.041 | 4.218 | 4.669 | 586539 | 6477393 | 100    |

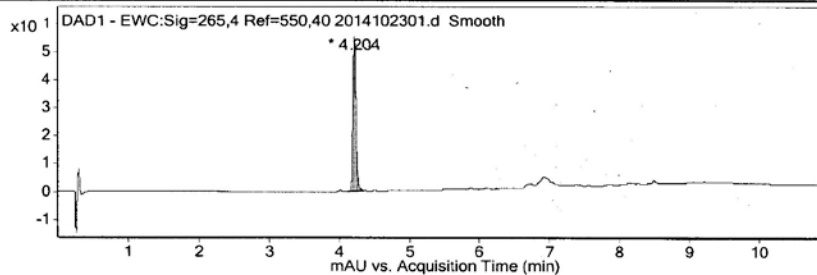

#### Integration Peak List

| Peak | Start | RT    | End   | Height | Area    | Area % |
|------|-------|-------|-------|--------|---------|--------|
| 1    | 4.109 | 4.204 | 4.358 | 55.12  | 175.529 | 100    |

### User Spectra

Fragmentor Voltage 135    Collision Energy 0    Ionization Mode ESI

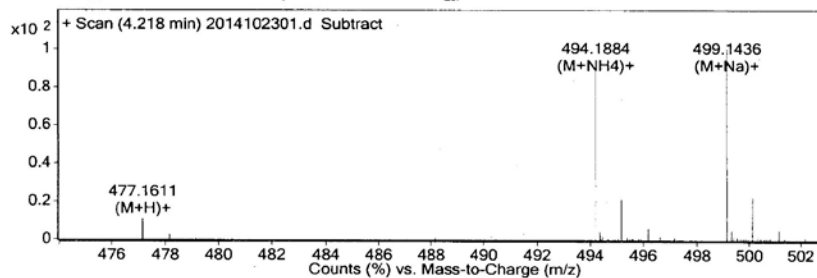

Fig. S38 The HR-ESI-MS data of compound 5.



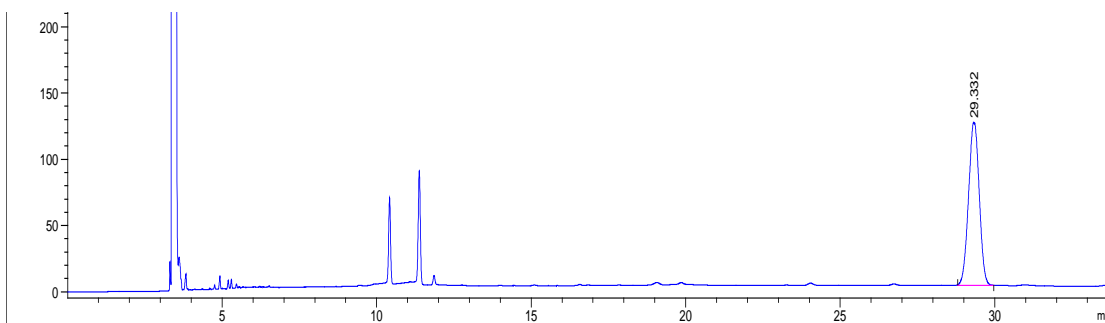

Fig. S39 The Gas Chromatographic separation of D-Glc.

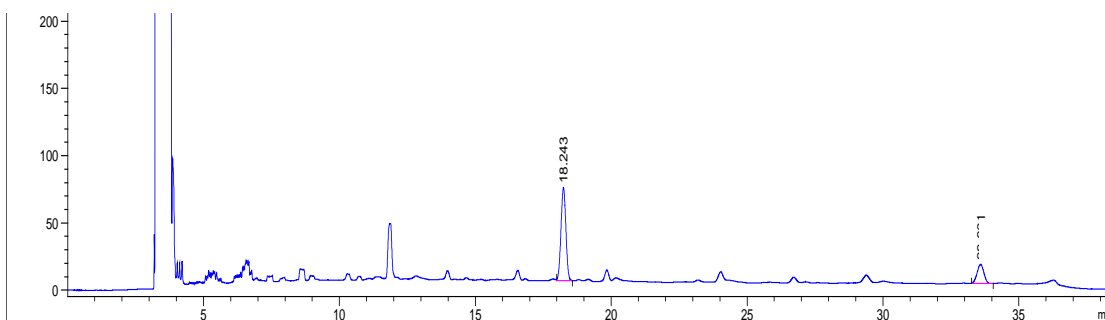

Fig. S40 The Gas Chromatographic separation of D-Api.

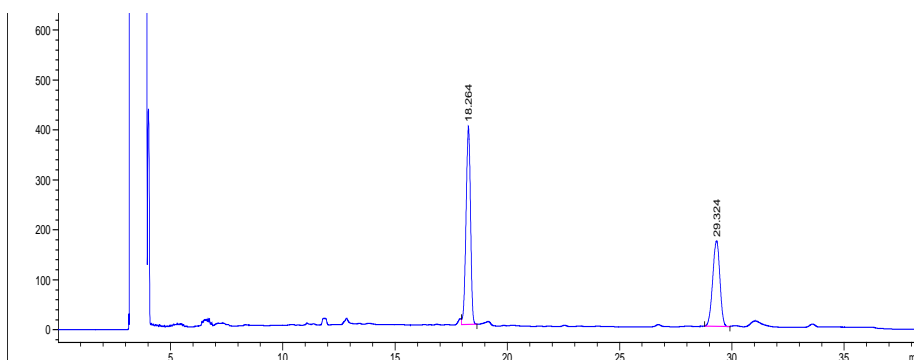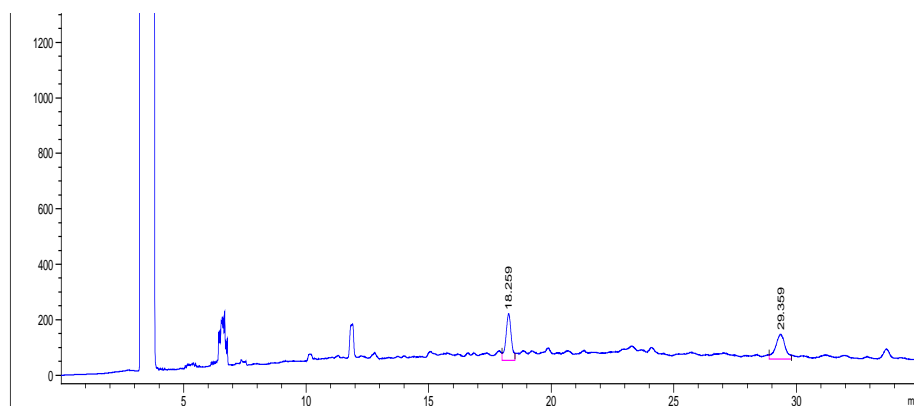

Fig. S41 The Gas Chromatographic analyses of sugar moieties of compounds **4** and **5**.

Table S42 Sixteen optimized conformations of **3Jb**.

| no. | conformer                                                                           | E (kJ/mol) | rel. E (kJ/mol) | Boltzmann Dist |
|-----|-------------------------------------------------------------------------------------|------------|-----------------|----------------|
| 1   | 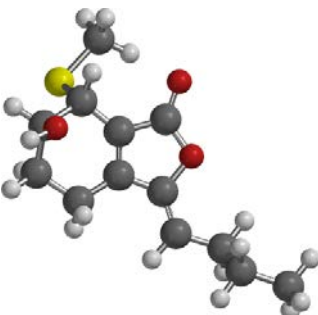   | 55.98      | 0.00            | 0.107          |
| 2   |    | 56.00      | 0.02            | 0.107          |
| 3   |   | 56.06      | 0.08            | 0.104          |
| 4   |  | 56.09      | 0.12            | 0.102          |

|   |                                                                                     |       |      |       |
|---|-------------------------------------------------------------------------------------|-------|------|-------|
| 5 | 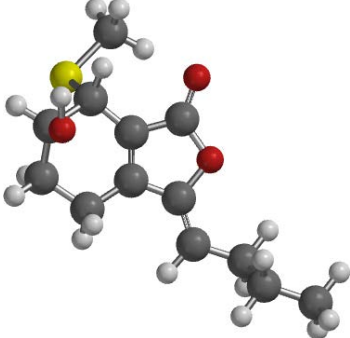   | 57.16 | 1.18 | 0.067 |
| 6 |    | 57.18 | 1.20 | 0.066 |
| 7 |   | 57.23 | 1.26 | 0.065 |
| 8 |  | 57.28 | 1.30 | 0.064 |
| 9 |  | 57.94 | 1.96 | 0.049 |

|    |                                                                                     |       |      |       |
|----|-------------------------------------------------------------------------------------|-------|------|-------|
| 10 | 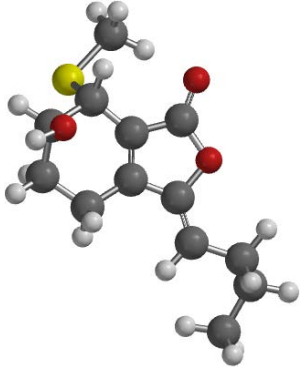   | 57.97 | 2.00 | 0.048 |
| 11 |    | 59.11 | 3.14 | 0.030 |
| 12 |   | 59.15 | 3.18 | 0.030 |
| 13 |  | 60.78 | 4.80 | 0.015 |
| 14 |  | 60.81 | 4.83 | 0.015 |

|    |                                                                                   |       |      |       |
|----|-----------------------------------------------------------------------------------|-------|------|-------|
| 15 | 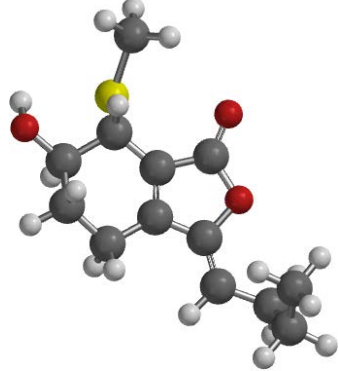 | 60.88 | 4.90 | 0.015 |
| 16 |  | 60.92 | 4.94 | 0.015 |

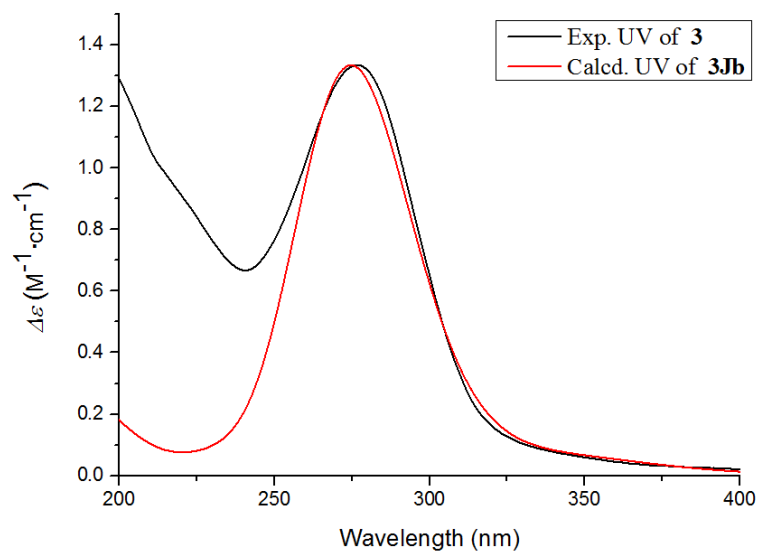

Fig. S43 The experimental UV spectrum of **3** and the calculated UV spectrum of **3Jb**.

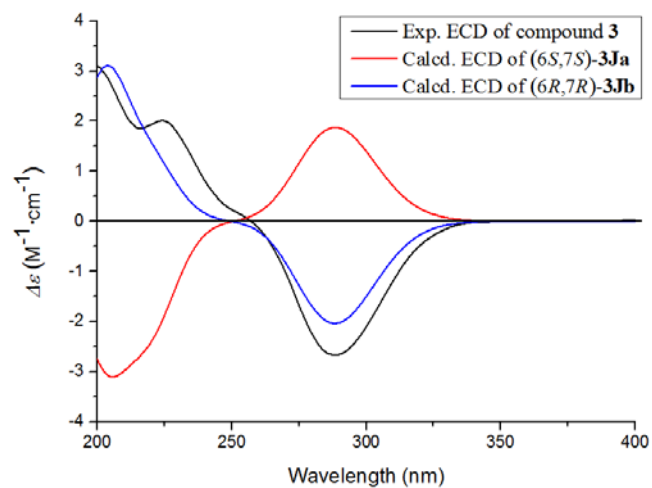

Fig. S44 Experimental ECD and calculated ECD spectrum of **3** in MeOH.
